# Supplementary material for: The moderating role of personal resources in the relationship between psychosocial job demands and health: a cross-sectional study
Source: PubMed Central journal article supplement — BMJ Open. 2017 Aug 28;7(8):e015710. doi: 10.1136/bmjopen-2016-015710 (PMC5724102; doi:10.1136/bmjopen-2016-015710), 2017-08-28
Supplement: bmjopen-2016-015710.draft_revisions.pdf [file bmjopen-2016-015710.draft_revisions.pdf]

# BMJ Open

BMJ Open is committed to open peer review. As part of this commitment we make the peer review history of every article we publish publicly available.

When an article is published we post the peer reviewers' comments and the authors' responses online. We also post the versions of the paper that were used during peer review. These are the versions that the peer review comments apply to.

The versions of the paper that follow are the versions that were submitted during the peer review process. They are not the versions of record or the final published versions. They should not be cited or distributed as the published version of this manuscript.

BMJ Open is an open access journal and the full, final, typeset and author-corrected version of record of the manuscript is available on our site with no access controls, subscription charges or pay-per-view fees (<http://bmjopen.bmj.com>).

If you have any questions on BMJ Open's open peer review process please email [info.bmjopen@bmj.com](mailto:info.bmjopen@bmj.com)

# BMJ Open

## The moderating role of personal resources in the relationship between psychosocial job demands and health: A retrospective study

|                                 |                                                                                                                                                                                                                                                                                                                                                                                                                                                                                |
|---------------------------------|--------------------------------------------------------------------------------------------------------------------------------------------------------------------------------------------------------------------------------------------------------------------------------------------------------------------------------------------------------------------------------------------------------------------------------------------------------------------------------|
| Journal:                        | <i>BMJ Open</i>                                                                                                                                                                                                                                                                                                                                                                                                                                                                |
| Manuscript ID                   | bmjopen-2016-015710                                                                                                                                                                                                                                                                                                                                                                                                                                                            |
| Article Type:                   | Research                                                                                                                                                                                                                                                                                                                                                                                                                                                                       |
| Date Submitted by the Author:   | 22-Dec-2016                                                                                                                                                                                                                                                                                                                                                                                                                                                                    |
| Complete List of Authors:       | Mayerl, Hannes; Medizinische Universität Graz, Institute of Social Medicine and Epidemiology<br>Stolz, Erwin; Medizinische Universität Graz, Institute of Social Medicine and Epidemiology<br>Großschädl, Franziska; Medizinische Universität Graz, Institute of Nursing Science<br>Rásky, Éva; Medizinische Universität Graz, Institute of Social Medicine and Epidemiology<br>Freidl, Wolfgang; Medizinische Universität Graz, Institute of Social Medicine and Epidemiology |
| <b>Primary Subject Heading</b>: | Public health                                                                                                                                                                                                                                                                                                                                                                                                                                                                  |
| Secondary Subject Heading:      | Occupational and environmental medicine                                                                                                                                                                                                                                                                                                                                                                                                                                        |
| Keywords:                       | Personal resources, Job resources, Job demands, Work-related health                                                                                                                                                                                                                                                                                                                                                                                                            |
|                                 |                                                                                                                                                                                                                                                                                                                                                                                                                                                                                |

SCHOLARONE™  
Manuscripts

only

1  
2  
3  
4  
5  
6  
7  
8  
9  
10  
11  
12  
13  
14  
15  
16  
17  
18  
19  
20  
21  
22  
23  
24  
25  
26  
27  
28  
29  
30  
31  
32  
33  
34  
35  
36  
37  
38  
39  
40  
41  
42  
43  
44  
45  
46  
47  
48  
49  
50  
51  
52  
53  
54  
55  
56  
57  
58  
59  
60

## The moderating role of personal resources in the relationship between psychosocial job demands and health: A retrospective study

Hannes Mayerl<sup>1</sup>, Erwin Stolz<sup>1</sup>, Franziska Großschädl<sup>2</sup>,  
Éva Rásky<sup>1</sup>, and Wolfgang Freidl<sup>1</sup>

<sup>1</sup>*Institute of Social Medicine and Epidemiology  
Medical University of Graz  
Universitaetsstrasse 6/I  
8010 Graz, Austria*

<sup>2</sup>*Institute of Nursing Science  
Medical University of Graz  
Billrothgasse 6  
8010 Graz, Austria*

To be submitted to  
*BMJ Open*

Word count: 4205

**Correspondence:** Correspondence concerning this article should be addressed to Hannes Mayerl, Institute of Social Medicine and Epidemiology, Medical University of Graz, Universitaetsstrasse 6/I, 8010 Graz, Austria. E-mail: [hannes.mayerl@medunigraz.at](mailto:hannes.mayerl@medunigraz.at), telephone: +43 (0) 316 380 7764, fax: +43 (0) 316 380 9665

## The moderating role of personal resources in the relationship between psychosocial job demands and health: A retrospective study

### ABSTRACT

**Objective** The main objective of this research was to investigate the buffering effects of an individual's physical, mental and social resources in the relationship between psychosocial job demands and: (1) health symptoms, (2) mental strain, and (3) the body mass index (BMI) respectively.

**Methods** We performed moderated regression analysis to examine data from a large cross-sectional survey of an Austrian employee sample ( $N=9,434$ ).

**Results** The results revealed a robust association between psychosocial job demands and health symptoms as well as mental strain, but only a weak relationship between psychosocial job demands and BMI. Although the personal resources showed a positive effect on health symptoms and mental strain, only weak evidence was found for the hypothesized interaction with psychosocial job demands. Solely the physical fitness of a person was found to mitigate the impact of psychosocial job demands on health symptoms.

**Conclusions** In conclusion, personal resources substantially accounted for the prediction of health. However, the interactions between psychosocial job demands and personal resources only slightly contributed to explaining the variation in health.

### STRENGTHS AND LIMITATIONS OF THIS STUDY

- The large representative sample allowed us to make comprehensible inferences to the Austrian working population.
- We designed an extensive regression model, which was apt to explain considerable proportions of the variation in health.
- Given the cross-sectional nature of this study, no claims can be made about causality.

## INTRODUCTION

In our modern society, the phenomenon of stress is ubiquitous. Especially psychosocial stressors represent a major risk factor for ill health[1]. Among other things, psychosocial stress was found to be related to musculoskeletal problems[2], psychosomatic complaints[3], sleep disturbances[4], mental health[5], and weight gain[6]. Particularly in working contexts stress plays a crucial role. Thus several models have been proposed in order to explain the origins of work-related stress. According to the job demands-control (JD-C) model[7, 8], stress reactions are supposed to be the consequence of a combination between high job demands and low autonomy at the workplace. A review of the JD-C model has shown good empirical support for health effects of job demands, but weak evidence for the hypothesized interaction between job demands and job control in predicting health[9].

Another widely used model is the effort-reward (ER) model[10]. This model maintains that stress reactions are due to the feeling that despite the high efforts made at work the reward (e.g. in terms of payment) remains insufficient. In a review, good empirical evidence was found for the negative impact of high efforts and low rewards combined, in terms of cardiovascular outcomes, psychosomatic symptoms, exhaustion, and well-being[11]. One limitation of the JD-C and the ER model is that they restrict themselves to specific types of demands or resources and thus these models lack flexibility[12].

One popular model integrating previous work-related stress concepts is the job demands-resources (JD-R) model[13]. Unlike the JD-C and the ER model, the JD-R model considers *any* combination of different types of job demands and job resources in predicting health and well-being[12]. Job demands relate to all job factors, that entail psychological or physical costs due to accelerated efforts. Job resources, by contrast, are defined as all physical, psychological, social, and organizational factors that are beneficial to goal attainment, reduce costs due to job demands, or facilitate growth and advancement[14, 13].

The JD-R model proposes two main effects[14]: the first effect is about health problems when individuals are exposed to high job demands beyond their resources. The second effect concerns the motivational aspects of job resources. Where resources are high, higher work engagement, lower cynicism, and better job performance are expected[15]. In addition to these two main effects, the JD-R model predicts an interaction between job demands and job resources in explaining mental and somatic health: On the one hand, job resources are thought to have the

1  
2  
3 potential to buffer the negative impact of job demands on health while, on the other hand,  
4 individuals working in low-resource environments are thought to be especially vulnerable to job  
5 demands. These assumptions were confirmed in a study demonstrating that the combination of  
6 low job resources and high job demands was associated with higher levels of burnout  
7 symptoms[16].  
8  
9

10  
11 A potential weakness of the JD-R model is that it focuses exclusively on job resources, while  
12 disregarding personal characteristics of individuals[12]. As research had shown personal resources  
13 to be a crucial factor for stress reactivity(e.g.[17]), extensions of the JD-R model have been  
14 proposed in order to shift the focus from job resources to personal resources. While job resources  
15 refer to the favourable factors in a person's working environment, personal resources relate to  
16 those aspects of the self which are associated with resilience[18]. Although the definition of  
17 personal resources implies the moderating effect of personal resources in the relationship between  
18 job demands and health, the empirical evidence for this effect remains rather weak and  
19 ambiguous[19].  
20  
21

22  
23 Previous studies with personal resources integrated in the JD-R model concentrated on mental  
24 aspects, such as self-efficacy, self-esteem, or optimism[19, 20, 21]. This may be considered to be  
25 a limitation, as the biological and social characteristics of individuals are neglected. For instance,  
26 it has been shown that physically fitter persons – although displaying a slightly higher reactivity to  
27 stress – showed quicker recovery from a stressful situation than people who were less fit[22].  
28 Additionally, in a recent experiment, physically fitter persons had a less strong inflammatory  
29 cytokine response to mental demands than persons with poor fitness[23]. These study results  
30 indicate that physical fitness may help to buffer the negative impact of excessive job demands on  
31 health. Furthermore, a meta-analysis has found social support to play a crucial role in the  
32 relationship between job demands and stress reactions[24]. The perception of being part of a  
33 social network or having friends who help in difficult situations is seen to be an important  
34 resource, with a capacity of buffering the influence of high demands on health outcomes. Thus,  
35 we defined personal resources in line with a bio-psycho-social way of thinking[25], as those  
36 biological, mental, and social aspects that may positively enhance an individual's resilience  
37 against several kinds of demands[26].  
38  
39  
40  
41  
42  
43  
44  
45  
46  
47  
48  
49  
50  
51  
52  
53  
54  
55

## 56 **The current study**

57  
58  
59  
60

1  
2  
3 In our study, we operationalised job demands as the burden emanating from psychosocial  
4 demands at the workplace. These include those psychological and social aspects of the job that are  
5 subjectively experienced as demanding and require sustained efforts on the part of employees[13].  
6  
7 As regards the personal resources, we used three indicators to account for biological, mental, and  
8 social aspects. More specifically speaking, we used the subjective evaluation of a person's  
9 physical fitness as an indicator for the biological aspect. The mental aspect referred to the concept  
10 of generalized self-efficacy, defined as a stable and global belief of being able to mobilize one's  
11 own skills in order to solve a specific problem or to attain a specific goal[27, 28]. As for the social  
12 component, we concentrated on social support outside of work.

13  
14 The outcome variables in our study comprised aspects of both mental and somatic health. More  
15 concretely, the somatic health outcomes referred to perceived health symptoms on the one hand  
16 and the body mass index (BMI) on the other hand. As regards mental strain reactions, we focused  
17 on irritation, alienation, and exhaustion. Irritation is seen as a state of mental impairment  
18 comprised of emotional irritation[29]. Alienation refers to psychological separation or  
19 estrangement from the self[30, 31]. Exhaustion is seen as the central quality of burnout,  
20 representing feelings of being depleted of one's resources[32].

21  
22 Against this backdrop, we defined three main hypotheses:

- 23 1. Based on extensive evidence for a detrimental impact of high demands on health, we  
24 expected a positive linear relationship to exist between psychosocial job demands and the  
25 three health outcomes.
  - 26 2. As personal resources had been found to be a beneficial factor for health, we predicted that  
27 individuals high in personal resources would report less health symptoms, less mental  
28 strain, and lower body mass indices than those low in personal resources.
  - 29 3. We hypothesized that the impact of psychosocial job demands on health would depend on  
30 the amount of personal resources available. That is, the consequences of psychosocial job  
31 demands on health outcomes would be less harmful for those availing of a great pool of  
32 personal resources. Thus, we expected each of the physical, mental, and social resources to  
33 moderate the relationships between psychosocial job demands and health outcomes.
- 34  
35  
36  
37  
38  
39  
40  
41  
42  
43  
44  
45  
46  
47  
48  
49  
50  
51  
52  
53  
54  
55  
56  
57  
58  
59  
60

## METHODS

### Data collection and participants

Data was collected among the Austrian working population by *The Institute for Empirical Social Studies (IFES)* on behalf of the *Upper Austrian Chamber of Labour* from 2012 to 2014. A sample consisting of 14,946 persons was drawn using proportionally stratified random sampling. Self-reported data concerning demographics, working conditions, and health-related characteristics was collected using the face-to-face structured interviewing method. Since the health-related items were only presented to employed (full-time) persons, the sample size reduced to  $N=9,434$  participants. 50.6% of the participants were male and the mean age across the sample was 39.7 years ( $SD=11.3$ ; range: 15-85 years). A rate of 9.2% had completed compulsory school, 64.8% were skilled workers with an apprenticeship certificate or had a graduation from a vocational school, 13.3% had a high school diploma, and 12.8% held a university degree.

### Measures

Items used in this research were partly derived from validated instruments, but were also selected as proxy measures representing the underlying constructs of interest. Descriptive statistics and the proportions of missing values for each measure can be found in the supplementary materials.

### Dependent variables

*Health symptoms* Participants were asked to indicate how often in the last weeks they had suffered from: (1) digestive problems, (2) headache/migraine, (3) sleep disturbances, (4) fatigue, (5) nervousness, (6) lack of concentration, (7) back pain, (8) leg pain, (9) hypertension, (10) tachycardia, (11) skin problems, (12) respiratory problems, or (13) chronic coughing. For each item, response categories ranged from “1=never” to “5=very often”.

*Mental strain* (1) To assess *irritation*, we included three items (e.g. “I anger quickly”) from the German Irritation Scale[33] developed for assessment of psychological strain in the context of work. (2) *Alienation* was operationalised with three items (e.g. “I often do not understand what is actually happening”) based on a subscale assessing the subjective feeling of being estranged from



1  
2  
3 the self[34]. (3) The burnout dimension *emotional exhaustion*[35] was measured with three items  
4 in total (e.g. “I feel exhausted due to work”). For each item measuring mental strain, response  
5 categories ranged from “1=I do not agree” to “5=I strongly agree”.  
6  
7  
8

9  
10 *Body mass index* The BMI was calculated for each participant as the body weight (in  
11 kilograms), divided by the square of body height (in meters).  
12  
13

## 14 15 16 Independent variables

17  
18 *Psychosocial job demands* To assess psychosocial job demands, we used six items measuring  
19 the burden due to both psychological and social aspects at the workplace. Participants had to rate,  
20 on a 5-point scale (“1=not stressed” to “5=strongly stressed”), how strongly they felt burdened by  
21 (1) isolation at the workplace, (2) time pressure, (3) emotionally burdening and annoying work,  
22 (4) high responsibility for goods and people, (5) changes in work routines, and (6) irregular  
23 working hours.  
24  
25  
26  
27  
28

29  
30 *Personal resources* (1) Physical: We used three items defining physical constitution (e.g. “How  
31 would you assess your physical fitness?”) as an indicator for physical resources, measured on a  
32 five-point rating scale (from “1=very poor” to “5=very good”). (2) Mental: The mental component  
33 referred to the construct of self-efficacy, which was measured using three items (response  
34 categories ranging from “1=I do not agree” to “5=I strongly agree”) from a German version of the  
35 “Generalized Self-efficacy Scale” (e.g. “I can always manage to solve difficult problems if I try  
36 hard enough”)[36, 37]. (3) Social: The social component was operationalised by three items (5-  
37 point rating scale ranging from “1=I do not agree” to “5=I strongly agree”) assessing social  
38 support (e.g. “I have persons beyond my immediate family circle, on whom I can count in case of  
39 emergency”).  
40  
41  
42  
43  
44  
45  
46  
47  
48

49  
50 *Job resources* (1) Job control was assessed using three items (e.g. “How satisfied are you with the  
51 possibilities to decide on work processes.”) measuring the amount of autonomy and decision  
52 latitude at work according to the JD-C model[7]. Response categories ranged from “1=not  
53 satisfied” to “5=very satisfied”. (2) Job rewards were operationalised by three items assessing  
54 satisfaction with (1) income, (2) occupational training opportunities, and (3) career and  
55  
56  
57  
58  
59  
60

1  
2  
3 development opportunities. Response categories ranged from “1=not at all satisfied” to “5=very  
4 satisfied”.

5  
6  
7  
8 *Health behaviour* To measure health-related risk behaviour, we included dichotomous  
9 answers for items assessing whether participants performed regular exercise in their leisure time  
10 (“0=yes”/”1=no”), ate healthy food (“0=yes”/”1=no”), or smoked (“0=not at all”/”1=occasionally  
11 or regularly”). These variables were treated as dummy variables. Additionally, participants were  
12 asked to indicate, on a six-point scale (from “1=not at all” to “6=nearly every day”), how often  
13 they consumed alcohol.  
14  
15  
16  
17  
18  
19

## 20 21 **Psychometric and statistical analysis**

### 22 23 Psychometric analysis

24  
25 We performed confirmatory factor analysis (CFA) to examine the dimensionality of the scales for  
26 health symptoms, mental strain, job demands, personal resources, and job resources. We relied on  
27 polychoric correlations and diagonally weighted least squares estimation with robust test statistics  
28 (WLSMV estimation)[38, 39]. To evaluate model-fit, we focused on the Comparative Fit Index  
29 (*CFI*), the Tucker Lewis Index (*TLI*), and the Root Mean Square Error of Approximation  
30 (*RMSEA*). Values  $\geq 0.95$  of the *CFI* and the *TLI*, and values  $\leq 0.06$  of the *RMSEA* were defined as  
31 sufficient[40]. Since CFA models with a total of three indicators were saturated, we only state the  
32 range of the factor loadings.  
33  
34  
35  
36  
37  
38  
39

### 40 41 Regression analysis

42  
43 To test our hypotheses, we used multiple linear regression analysis and moderated regression  
44 analysis. As we were interested in the relative importance of the three personal resources and their  
45 moderating effects, we applied a hierarchical approach: In Model I, we regressed each of the three  
46 dependent variables on all independent variables except for the personal resources. In Model II,  
47 the personal resources were added to the regression models as predictors, and in Model III, we  
48 additionally considered the interactions between the three personal resources and job demands by  
49 including the product terms of the corresponding scores.  
50  
51  
52  
53  
54

55 To handle missing data (1.28% in total), we applied multiple imputation by chained equations.  
56 Each regression analysis was repeated for the  $m=20$  imputed data sets and the results were pooled  
57  
58  
59  
60

1  
2  
3 according to Rubin's rules[41]. All psychometric and statistical analyses were carried out with R  
4 3.1.2[42]. CFA was done using the R-package lavaan 0.5-17[43] while multiple imputation was  
5 carried out using the R-package mice 2.22[44].  $P$ -values  $\leq 0.01$  were defined as statistically  
6 significant.  
7  
8  
9

## 10 11 12 **RESULTS**

### 13 14 **Psychometric analysis**

15  
16 *Health symptoms* The one-factor model for health symptoms fitted the data sufficiently well  
17 ( $\chi^2(65)=2058.5$ ,  $p<0.001$ ;  $CFI=0.959$ ;  $TLI=0.951$ ;  $RMSEA=0.057$ ) and internal consistency was  
18 good (Cronbach's  $\alpha=0.93$ ).  
19  
20  
21

22  
23 *Mental strain* The model for mental strain consisted of three first-order factors – irritation,  
24 alienation, and exhaustion – that form the second-order factor mental strain. This model  
25 adequately fitted the data ( $\chi^2(24)=568.7$ ,  $p < 0.001$ ;  $CFI=0.998$ ;  $TLI=0.997$ ;  $RMSEA=0.049$ ) and  
26 internal consistency of the second-order factor was acceptable ( $\alpha=0.76$ ).  
27  
28  
29

30  
31  
32 *Psychosocial job demands* For psychosocial job demands, we tested a one-factor model. The  
33 indices confirmed model fit ( $\chi^2(9)=257.7$ ,  $p < 0.001$ ;  $CFI=0.990$ ;  $TLI=0.984$ ;  $RMSEA=0.054$ ) and  
34 internal consistency was sufficient ( $\alpha=0.84$ ).  
35  
36  
37

38  
39 *Personal resources* (1) Physical: The factor loadings of the items measuring the physical  
40 component ranged from  $\lambda=0.73$  to  $\lambda=0.91$ . (2) Mental: The correlations between the latent factor  
41 and the items measuring self-efficacy were between  $\lambda=0.81$  and  $\lambda=0.86$ . (3) Social: The factor  
42 loadings of the items assessing social support ranged from  $\lambda=0.88$  to  $\lambda=0.91$ . Internal consistency  
43 for the physical ( $\alpha=0.88$ ), the mental ( $\alpha=0.87$ ), and the social ( $\alpha=0.93$ ) component was good.  
44  
45  
46  
47  
48

49  
50 *Job resources* (1) Job control: The items measuring job control loaded on the latent factor in a  
51 range between  $\lambda=0.56$  and  $\lambda=0.89$ . (2) Job rewards: The factor loadings of the items assessing job  
52 rewards ranged from  $\lambda=0.54$  to  $\lambda=0.91$ . Internal consistency for job control ( $\alpha=0.79$ ) and job  
53 rewards ( $\alpha=0.81$ ) was sufficient.  
54  
55  
56  
57  
58  
59  
60

We calculated estimates for health symptoms, job demands, and each subscale of the personal and job resources by averaging the respective raw scores. As regards to mental strain, we averaged the mean scores for irritation, alienation, and exhaustion in order to obtain an estimate for mental strain. These mean scores were used in subsequent analyses.

### Regression analysis

An overview of the coefficients of determination for the Models I-III can be found in Table 1. We found that adding the three personal resources as predictors in Model II has significantly improved the prediction for health symptoms, mental strain, and BMI. By additionally including the product terms between psychosocial job demands and each of the three personal resources as predictors in the third step, the predictions for health symptoms and mental strain were significantly enhanced when compared to the models in the second step. As for BMI, the inclusion of the product terms in the third step did not significantly increase the coefficient of determination. In the next paragraphs we report the regression coefficients for Model III, including all predictors and interactions.

Table 1: **Coefficients of determination for the Models I-III**

| Model      | Health symptoms |              |                         |        | Mental strain |              |                         |        | Body mass index |              |                         |        |
|------------|-----------------|--------------|-------------------------|--------|---------------|--------------|-------------------------|--------|-----------------|--------------|-------------------------|--------|
|            | $R^2$           | $\Delta R^2$ | $F$<br>( $df_1, df_2$ ) | $p$    | $R^2$         | $\Delta R^2$ | $F$<br>( $df_1, df_2$ ) | $p$    | $R^2$           | $\Delta R^2$ | $F$<br>( $df_1, df_2$ ) | $p$    |
| <b>I</b>   | 0.273           |              |                         |        | 0.361         |              |                         |        | 0.189           |              |                         |        |
| <b>II</b>  | 0.368           | 0.095        | 461.9<br>(3, 122327)    | <0.001 | 0.446         | 0.085        | 448.7<br>(3, 11604)     | <0.001 | 0.198           | 0.010        | 37.6<br>(3, 80402)      | <0.001 |
| <b>III</b> | 0.376           | 0.008        | 38.4<br>(3, 23376)      | <0.001 | 0.451         | 0.005        | 29.9<br>(3, 25897)      | <0.001 | 0.198           | 0.000        | 0.8<br>(3, 15297)       | 0.482  |

Table notes. Model I includes all predictors except for the personal resources. In Model II the personal resources were added and in Model III we additionally considered the interactions between the personal resources and psychosocial job demands.

*Health symptoms* Listed in Table 2 are the results of the multiple regression analysis for health symptoms. There was a significant effect of psychosocial job demands on health

symptoms, i.e. higher amounts of job demands were accompanied with higher levels of health symptoms. Among the personal resources, the physical component had the relatively highest explanatory value, while there was an insignificant effect for the mental component and a significant but relatively weak effect for the social component.

Table 2: Regression coefficients for health symptoms, mental strain, and BMI.

|                                       | Health symptoms      |          | Mental strain        |          | Body mass index      |          |
|---------------------------------------|----------------------|----------|----------------------|----------|----------------------|----------|
|                                       | $\beta$ [99% CI]     | <i>p</i> | $\beta$ [99% CI]     | <i>p</i> | $\beta$ [99% CI]     | <i>p</i> |
| <b>(Intercept)</b>                    | -0.51 [-0.64, -0.38] | 0.000    | 0.06 [-0.06, 0.19]   | 0.198    | -0.59 [-0.74, -0.44] | 0.000    |
| <b>Job demands</b>                    | 0.23 [0.21, 0.26]    | 0.000    | 0.40 [0.37, 0.42]    | 0.000    | 0.04 [0.01, 0.07]    | 0.000    |
| <b>Personal resources</b>             |                      |          |                      |          |                      |          |
| <b>Physical</b>                       | -0.35 [-0.38, -0.33] | 0.000    | -0.16 [-0.18, -0.13] | 0.000    | -0.11 [-0.14, -0.08] | 0.000    |
| <b>Mental</b>                         | -0.02 [-0.05, 0.00]  | 0.021    | -0.23 [-0.25, -0.20] | 0.000    | 0.05 [0.02, 0.07]    | 0.000    |
| <b>Social</b>                         | -0.04 [-0.06, -0.01] | 0.000    | -0.09 [-0.11, -0.07] | 0.000    | -0.03 [-0.05, 0.00]  | 0.010    |
| <b>Job resources</b>                  |                      |          |                      |          |                      |          |
| <b>Control</b>                        | -0.01 [-0.05, 0.02]  | 0.285    | -0.03 [-0.06, 0.00]  | 0.010    | 0.04 [0.01, 0.08]    | 0.003    |
| <b>Rewards</b>                        | -0.08 [-0.12, -0.05] | 0.000    | -0.01 [-0.04, 0.02]  | 0.257    | 0.01 [-0.02, 0.05]   | 0.380    |
| <b>Health behaviour</b>               |                      |          |                      |          |                      |          |
| <b>Exercise (ref.: yes)</b>           |                      |          |                      |          |                      |          |
| <b>Exercise (no)</b>                  | -0.12 [-0.16, -0.07] | 0.000    | 0.00 [-0.04, 0.05]   | 0.825    | 0.18 [0.12, 0.23]    | 0.000    |
| <b>Diet (ref.: healthy)</b>           |                      |          |                      |          |                      |          |
| <b>Diet (unhealthy)</b>               | -0.02 [-0.06, 0.03]  | 0.400    | -0.05 [-0.10, -0.01] | 0.002    | 0.29 [0.24, 0.34]    | 0.000    |
| <b>Smoking (ref.: no)</b>             |                      |          |                      |          |                      |          |
| <b>Smoking (yes)</b>                  | 0.01 [-0.04, 0.05]   | 0.731    | 0.14 [0.10, 0.18]    | 0.000    | -0.03 [-0.09, 0.02]  | 0.085    |
| <b>Drinking</b>                       | -0.01 [-0.02, 0.01]  | 0.306    | -0.01 [-0.02, 0.01]  | 0.341    | -0.03 [-0.05, -0.02] | 0.000    |
| <b>Gender (ref.: male)</b>            |                      |          |                      |          |                      |          |
| <b>Gender (female)</b>                | 0.23 [0.19, 0.28]    | 0.000    | 0.05 [0.01, 0.09]    | 0.003    | -0.49 [-0.54, -0.43] | 0.000    |
| <b>Age</b>                            | 0.01 [0.01, 0.01]    | 0.000    | 0.00 [-0.00, 0.00]   | 0.124    | 0.02 [0.02, 0.02]    | 0.000    |
| <b>Education (ref.: compulsory)</b>   |                      |          |                      |          |                      |          |
| <b>Education (skilled/vocational)</b> | 0.04 [-0.03, 0.12]   | 0.155    | -0.12 [-0.19, -0.04] | 0.000    | -0.05 [-0.14, 0.04]  | 0.122    |

|                                         |                      |       |                      |       |                      |       |
|-----------------------------------------|----------------------|-------|----------------------|-------|----------------------|-------|
| <b>Education (high school)</b>          | 0.09 [-0.00, 0.18]   | 0.013 | -0.17 [-0.26, -0.08] | 0.000 | -0.12 [-0.23, -0.02] | 0.003 |
| <b>Education (academic)</b>             | 0.07 [-0.02, 0.17]   | 0.053 | 0.10 [0.01, 0.19]    | 0.005 | -0.28 [-0.39, -0.17] | 0.000 |
| <b>Marital status (ref.: single)</b>    |                      |       |                      |       |                      |       |
| <b>Marital status (partnership)</b>     | -0.02 [-0.08, 0.03]  | 0.267 | -0.11 [-0.16, -0.06] | 0.000 | -0.01 [-0.07, 0.05]  | 0.581 |
| <b>Marital status (div./wid.)</b>       | -0.05 [-0.13, 0.02]  | 0.072 | -0.18 [-0.26, -0.11] | 0.000 | -0.09 [-0.18, -0.00] | 0.007 |
| <b>Job demands × Physical resources</b> | -0.09 [-0.11, -0.07] | 0.000 | -0.03 [-0.05, -0.00] | 0.001 | -0.01 [-0.03, 0.01]  | 0.248 |
| <b>Job demands × Mental Resources</b>   | 0.01 [-0.01, 0.03]   | 0.248 | -0.05 [-0.07, -0.03] | 0.000 | -0.00 [-0.03, 0.02]  | 0.878 |
| <b>Job demands × Social Resources</b>   | 0.02 [0.00, 0.05]    | 0.006 | -0.02 [-0.05, -0.00] | 0.002 | 0.01 [-0.01, 0.04]   | 0.208 |

Table notes.  $N=9,434$ . This table shows the pooled regression coefficients for health symptoms, mental strain, and BMI respectively. Health symptoms, mental strain, BMI, job demands, personal resources, and job resources were included as standardized measures. Categorical variables were included as dummy variables. ref.=reference group. div.=divorced. wid.=widowed.

However, physical and social resources also interacted with job demands. To clarify this interaction, Figure 1 shows the simple slopes of psychosocial job demands for low (10th quantile), middle (50th quantile), and high (90th quantile) values for personal resources. As seen in the first row on the left, persons high in physical resources are expected to have less health symptoms than persons low in physical resources. Moreover, good physical constitution seemed to buffer the impact of job demands on health symptoms. The predicted values for health symptoms increased less strongly as a function of psychosocial job demands in those high in physical resources than in those low in physical resources. Looking at the central and the right figure in the first row, neither a difference in health symptoms between the three lines nor a clear interaction effect between the personal resources and psychosocial job demands is evident.

Returning to Table 2: for the job resources we found a significant effect only for job rewards. That is, persons who reported more rewards reported less health symptoms. Among the health-related behaviours only the variable exercise was related to health symptoms. Persons who actively practised sports stated more health symptoms than those not actively practising sports. Furthermore, the health status worsened with increased age, and, overall, women reported more health symptoms than men. Neither education nor marital status showed an impact.

1  
2  
3 *Mental strain* As seen in Table 2, psychosocial job demands had a relatively strong relation to  
4 mental strain. On the other hand, there were negative effects for the physical, mental, and social  
5 components of personal resources, respectively. However, we also found an interaction effect  
6 between job demands and personal resources. The second row of Figure 1 reveals higher levels of  
7 mental strain in those low in personal resources than in those high in personal resources, whereby  
8 the difference was greater for the physical and mental components and smaller for the social  
9 component. However, the interaction effects appear to be relatively weak and the practical  
10 implications are questionable.

11  
12 As for the job resources, no significant effects were found. Among the health-related behaviours  
13 the variables diet and smoking were related to mental strain. Unhealthy diet and smoking seemed  
14 to be accompanied with higher levels of mental strain. In general, women indicated to experience  
15 more mental strain than men. Age in turn had no impact. Considering the educational level,  
16 university graduates (vs. employees with compulsory education) indicated higher levels of mental  
17 strain, and skilled workers/graduates from a vocational school and workers with a high school  
18 diploma reported less levels of mental strain. Regarding marital status, persons in a partnership as  
19 well as divorced/widowed persons reported lower levels of mental strain than singles.

20  
21  
22  
23  
24  
25  
26  
27  
28  
29  
30  
31  
32  
33 *Body mass index* Although there was a significant positive relationship between psychosocial  
34 job demands and BMI, the effect was less strong than for health symptoms and mental strain. The  
35 findings concerning the personal resources were ambiguous. Physical resources were negatively  
36 associated with BMI and mental resources were positively related to BMI. By contrast, social  
37 resources did not account for prediction. Additionally, none of the interactions between  
38 psychosocial job demands and either of the three personal resources were significant (also see  
39 Figure 1, third row).

40  
41  
42  
43  
44  
45  
46  
47  
48  
49  
50  
51  
52  
53  
54  
55  
56  
57  
58  
59  
60  
Regarding job resources, we found that persons who reported higher job control had a higher  
BMI. Hardly surprisingly was health-related behaviour related to BMI. Unhealthy diet and lack of  
exercise were accompanied by a higher BMI. Smoking was not related to BMI, and alcohol  
consumption was negatively related to BMI. Furthermore, university graduates and workers with a  
high school diploma had a lower BMI than workers with compulsory education. In addition,  
divorced/widowed persons had a lower BMI than singles.

## DISCUSSION

The main objective of this study was to uncover physical, mental, and social resources that can be beneficial in maintaining individual health despite a high burden due to psychosocial demands experienced at the workplace. In line with the first hypothesis, we found a robust positive association between psychosocial job demands and health symptoms as well as mental strain. These study results support previous prospective studies demonstrating that people working in psychosocially demanding environments have a greater risk for somatic[46, 47] and mental health issues[48, 49]. We also expected to find a positive relationship between psychosocial job demands and BMI[50, 51]. However, although this effect was significant, the relative explanatory value was low in comparison to other predictors in the model. The reason for this weak effect may be due to a bidirectional impact of job demands on body weight. This means that the burden due to high job demands may cause some people to reduce their food intake and lose weight and other people to eat more and gain weight. Indeed, in a longitudinal study, work-related stress showed an increase of the BMI in overweight persons but a reduction in lean persons[52].

The findings for the second and third main hypotheses are discussed in more detail below. For health symptoms, a relatively clear relationship was found with physical resources. On the one hand, we found that persons high in physical resources reported less health symptoms than those low in physical resources, and on the other hand, that physical resources seem to be a beneficial factor buffering the negative influences of psychosocial job demands on health. These results support previous conclusions concerning physical constitution as a crucial factor in the relationship between stress and somatic health and well-being[53, 54]. It may be argued that fitter persons are more able to cope with psychosocial demands while exhibiting a less strong physiological activation which otherwise, in the long term, may result in bodily damages[55, 56]. In a similar vein, we expected the mental and social resources of an individual to be further factors for buffering the negative impact of psychosocial job demands on health symptoms. However, we did not find any effect that was strong enough to have practical implications.

For mental strain, our findings regarding the predicted positive effects of personal resources were relatively straightforward. In other words, a good physical constitution, the confidence in one's own abilities, and a helpful circle of friends appeared to promote mental health[26, 57]. However,



1  
2  
3 although the hypothesized interaction effects were significant, they remained small. Regarding the  
4 relationship between BMI and personal resources, there was only one result confirming our  
5 hypotheses in that we found a negative association between BMI and physical resources. Little  
6 surprisingly, individuals feeling physically fit had a lower BMI than those with poor physical  
7 fitness. On the other hand, higher levels of mental resources were accompanied by a slightly  
8 higher BMI. This result somewhat contradicted the results of previous studies. For example, in a  
9 recent study it has been found that individuals high in self-efficacy had a lower BMI than those  
10 low in self-efficacy[58]. Moreover, in terms of the hypothesized moderating effect of personal  
11 resources, we did not find a significant result.

12  
13 Overall, we found that including the personal resources substantially improved the prediction for  
14 health symptoms and mental strain. These findings clearly support recent approaches of  
15 considering personal resources in work-related stress models[19, 20]. On the other hand, by  
16 adding the interactions between psychosocial job demands and the personal resources, the change  
17 of explained variance was relatively weak. Hence, it remains questionable whether personal  
18 resources should be treated as moderators in the relationship between job demands and health.  
19 Apart from the buffering effect found for physical resources regarding the impact of psychosocial  
20 job demands on health symptoms, the interaction effects only slightly contributed to the  
21 prediction.

### 22 23 24 25 26 27 28 29 30 31 32 33 34 35 36 37 **Strengths and limitations**

38 One shortcoming of our study concerns its cross-sectional nature. The effects are only  
39 correlational and no causal inferences can be made. Longitudinal studies will thus be needed in  
40 order to investigate the causal relationships between job demands, health, and the different  
41 components of personal resources. A further limitation might reside in the self-reported character  
42 of the analysed data and in the fact that the measures yielded only approximate indices of the  
43 respective underlying constructs. More objective and standardized measures (e.g. physical fitness  
44 tests) might have led to more reliable findings. One strength of our research is that we designed an  
45 extensive model, which was apt to explain considerable proportions of the variation in mental  
46 strain (45%) and health symptoms (38%). A further strength of our study was the representative  
47 large-size sample, which allowed us to make comprehensible inferences to the working population  
48 in Austria.

## Conclusion and practical implications

Three conclusions can be drawn:

1. High psychosocial job demands were related to higher levels of health symptoms and of mental strain.
2. Personal resources in a bio-psycho-social sense may be beneficial factors for somatic and mental health.
3. Concerning the moderating role of personal resources, only weak evidence was found in that physical resources seemed to attenuate the negative impact of psychosocial job demands on somatic health. Overall, the moderating effects of the personal resources only slightly accounted for the prediction of health outcomes.

Our findings suggest that organizational goals should especially address the reduction of overwhelming psychosocial job demands in order to decrease work-related health problems. A further objective for health promotion concerns the empowerment of the employee's personal resources. In highly demanding working environments particularly high physical resources of a person seem to cushion the detrimental effects that psychosocial job demands have on health. Thus the promotion of physical fitness is a higher purpose when it comes to preventing health problems in highly demanding jobs.

## ACKNOWLEDGEMENTS

We are grateful to the Upper Austrian Chamber of Labour for regularly collecting data in order to monitor work climate and mental and somatic health of employees. We would also like to thank them for the good cooperation and for providing us with the data.

## FOOTNOTES

### Contributors

HM, WF, and ES conceived and designed the study. HM, WF, and ES analysed the data. HM wrote the paper. WF, ES, FG, and ER critically reviewed drafts of the paper. HM, WF, ES, FG, and ER interpreted the study findings. All authors approved the final version of the manuscript.

### Funding

This research received no specific grant from any funding agency in the public, commercial or not-for-profit sectors.

### Competing interests

No competing interests.

### Ethics approval

The Ethics Committee of the Medical University of Graz approved the conductance of this study (EK-number: 27-251 ex 14/15).

### Data sharing statement

No additional data available.

## REFERENCES

- 1 Nixon AE, Mazzola JJ, Bauer J, et al. Can work make you sick? A meta-analysis of the relationships between job stressors and physical symptoms. *Work Stress* 2011;25:1–22. doi:10.1080/02678373.2011.569175.
- 2 Bongers PM, de Winter CR, Kompier MA, et al. Psychosocial factors at work and musculoskeletal disease. *Scand J Work Env Hea* 1993;19:297–312.
- 3 Frese M. Stress at work and psychosomatic complaints: a causal interpretation. *J Appl Psychol* 1985;70:314–328. doi:10.1037/0021-9010.70.2.314.
- 4 Åkerstedt T. Psychosocial stress and impaired sleep. *Scand J Work Env Hea* 2006;32:493–501. doi:10.5271/sjweh.1054.
- 5 Stansfeld S, Candy B. Psychosocial work environment and mental health—a meta-analytic review. *Scand J Work Env Hea* 2006;32:443–462. doi:10.5271/sjweh.1050.
- 6 Block JP, He Y, Zaslavsky AM, et al. Psychosocial stress and change in weight among US adults. *Am J Epidemiol* 2009;170:181–192. doi:10.1093/aje/kwp104.
- 7 Karasek RA. Job demands, job decision latitude, and mental strain: Implications for job redesign. *Admin Sci Quart* 1979;24:285–308.
- 8 Karasek RA. Lower health risk with increased job control among white collar workers. *J Organiz Behav* 1990;11:171–185. doi:10.1002/job.4030110302.

- 1  
2  
3  
4 9 De Lange AH, Taris TW, Kompier MA, et al. "The very best of the millennium":  
5 Longitudinal research and the demand-control-(support) model. *J Occup Health Psych*  
6 2003;8:282–305. doi:10.1037/1076-8998.8.4.282.  
7  
8  
9 10 Siegrist J. Adverse health effects of high-effort/low-reward conditions. *J Occup Health Psych*  
10 1996;1:27–41. doi:10.1037/1076-8998.1.1.27.  
11  
12 11 Vegchel Nv, Jonge Jd, Bosma H, et al. Reviewing the effort–reward imbalance model:  
13 drawing up the balance of 45 empirical studies. *Soc Sci* 2005;60:1117–1131.  
14 doi:10.1016/j.socscimed.2004.06.043.  
15  
16  
17 12 Schaufeli WB, Taris TW. A Critical Review of the Job Demands-Resources Model:  
18 Implications for Improving Work and Health. In: Bauer GF, Hämmig O, eds. *Bridging*  
19 *Occupational, Organizational and Public Health: A Transdisciplinary Approach*. Dordrecht:  
20 Springer Netherlands 2014:43–68.  
21  
22  
23 13 Demerouti E, Bakker AB, Nachreiner F, et al. The job demands-resources model of burnout.  
24 *J Appl Psychol* 2001;86:499–512. doi:10.1037/0021-9010.86.3.499.  
25  
26  
27 14 Bakker AB, Demerouti E, De Boer E, et al. Job demands and job resources as predictors of  
28 absence duration and frequency. *J Vocat Behav* 2003;62:341–356. doi:10.1016/S0001-  
29 8791(02)00030-1.  
30  
31  
32 15 Bakker AB, Demerouti E. The job demands-resources model: State of the art. *J Manage*  
33 *Psychol*  
34 2007;22:309–328. doi:10.1108/02683940710733115.  
35  
36  
37 16 Bakker AB, Demerouti E, Euwema MC. Job resources buffer the impact of job demands on  
38 burnout. *J Occup Health Psych* 2005;10:170–180. doi:10.1037/1076-8998.10.2.170.  
39  
40  
41 17 Ong AD, Bergeman C, Bisconti TL, et al. Psychological resilience, positive emotions, and  
42 successful adaptation to stress in later life. *J Pers Soc Psychol* 2006;91:730–749.  
43 doi:10.1037/0022-3514.91.4.730.  
44  
45  
46 18 Hobfoll SE, Johnson RJ, Ennis N, et al. Resource loss, resource gain, and emotional outcomes  
47 among inner city women. *J Pers Soc Psychol* 2003;84:632–643. doi:10.1037/0022-  
48 3514.84.3.632.  
49  
50  
51 19 Xanthopoulou D, Bakker AB, Demerouti E, et al. The role of personal resources in the job  
52 demandsresources model. *Int J Stress Manag* 2007;14:121–141. doi:10.1037/1072-  
53 5245.14.2.121.  
54  
55  
56  
57  
58  
59  
60

- 1  
2  
3  
4  
5  
6  
7  
8  
9  
10  
11  
12  
13  
14  
15  
16  
17  
18  
19  
20  
21  
22  
23  
24  
25  
26  
27  
28  
29  
30  
31  
32  
33  
34  
35  
36  
37  
38  
39  
40  
41  
42  
43  
44  
45  
46  
47  
48  
49  
50  
51  
52  
53  
54  
55  
56  
57  
58  
59  
60
- 21 Xanthopoulou D, Bakker AB, Demerouti E, et al. Reciprocal relationships between job resources, personal resources, and work engagement. *J Vocat Behav* 2009;74:235–244. doi:10.1016/j.jvb.2008.11.003.
- 22 Airila A, Hakanen JJ, Schaufeli WB, et al. Are job and personal resources associated with work ability 10 years later? The mediating role of work engagement. *Work Stress* 2014;28:87–105. doi:10.1080/02678373.2013.872208.
- 23 Jackson EM, Dishman RK. Cardiorespiratory fitness and laboratory stress: A meta-regression analysis. *Psychophysiology* 2006;43:57–72. doi:10.1111/j.1469-8986.2006.00373.x.
- 24 Hamer M, Steptoe A. Association between physical fitness, parasympathetic control, and proinflammatory responses to mental stress. *Psychosom Med* 2007;69:660–666. doi:10.1097/PSY.0b013e318148c4c0.
- 25 Viswesvaran C, Sanchez JI, Fisher J. The Role of Social Support in the Process of Work Stress: A Meta-Analysis. *J Vocat Behav* 1999;54:314–334. doi:10.1006/jvbe.1998.1661.
- 26 Engel GL. The need for a new medical model: A challenge for biomedicine. *Science* 1977;196:129–136. doi:10.1126/science.847460.
- 27 Mayerl H, Stolz E, Waxenegger A, et al. The Role of Personal and Job Resources in the Relationship between Psychosocial Job Demands, Mental Strain, and Health Problems. *Front Psychol* 2016;7:1214. doi:10.3389/fpsyg.2016.01214.
- 28 Bandura A. Self-efficacy mechanism in human agency. *Am Psychol* 1982;37:122–147. doi:10.1037/0003066X.37.2.122.
- 29 Schwarzer R, Bäßler J, Kwiatek P, et al. The Assessment of Optimistic Self-beliefs: Comparison of the German, Spanish, and Chinese Versions of the General Self-efficacy Scale. *Appl Psychol* 1997;46:69–88. doi:10.1111/j.1464-0597.1997.tb01096.x.
- 30 Mohr G, Müller A, Rigotti T, et al. The Assessment of Psychological Strain in Work Contexts. *Eur J Psychol Assess* 2006;22:198–206. doi:10.1027/1015-5759.22.3.198.
- 31 Fromm E. *The Sane Society*. 2nd ed. London: Routledge & Kegan Paul 1955.
- 32 Kanungo RN. The concepts of alienation and involvement revisited. *Psychol Bull* 1979;86:119–138. doi:10.1037/0033-2909.86.1.119.
- 33 Maslach C, Schaufeli WB, Leiter MP. Job burnout. *Annu Rev Psychol* 2001;52:397–422.

- 1  
2  
3  
4  
5  
6  
7  
8  
9  
10  
11  
12  
13  
14  
15  
16  
17  
18  
19  
20  
21  
22  
23  
24  
25  
26  
27  
28  
29  
30  
31  
32  
33  
34  
35  
36  
37  
38  
39  
40  
41  
42  
43  
44  
45  
46  
47  
48  
49  
50  
51  
52  
53  
54  
55  
56  
57  
58  
59  
60
- 34 Mohr G, Rigotti T, Müller A. Irritation - ein Instrument zur Erfassung psychischer Beanspruchung im Arbeitskontext. Skalen - und Itemparameter aus 15 Studien. *Z Arb Organ* 2005;49:44–48. doi:10.1026/09324089.49.1.44.
- 35 Freidl W. The impact of anomia as a factor in a demand resource model of health. *Soc Sci Med* 1997;44:1357–1365.
- 37 Maslach C, Jackson SE. The measurement of experienced burnout. *J Organiz Behav* 1981;2:99–113. doi:10.1002/job.4030020205.
- 38 Schwarzer R, Jerusalem M. Generalized self-efficacy scale. In: Weinman J, Wright S, Johnston M, eds. *Measures in health psychology: A user's portfolio. Causal and control beliefs*. Windsor, England: NFER-NELSON 1995:35–37.
- 39 Schwarzer R, Jerusalem M. *Skalen zur Erfassung von Lehrer- und Schülermerkmalen: Dokumentation der psychometrischen Verfahren im Rahmen der Wissenschaftlichen Begleitung des Modellversuchs Selbstwirksame Schulen*. Berlin: Freie Universität Berlin 1999.
- 40 Muthén B. A general structural equation model with dichotomous, ordered categorical, and continuous latent variable indicators. *Psychometrika* 1984;49:115–132. doi:10.1007/BF02294210.
- 41 Jöreskog KG. Structural equation modeling with ordinal variables. *Multivariate analysis and its applications*. Hayward, CA: Institute of Mathematical Statistics 1994: 297–310. doi:10.1214/lnms/1215463803.
- 42 Hu Lt, Bentler PM. Cutoff criteria for fit indexes in covariance structure analysis: Conventional criteria versus new alternatives. *Struct Equ Modeling* 1999;6:1–55. doi:10.1080/10705519909540118.
- 43 Rubin DB. *Multiple imputation for nonresponse in surveys*. New York: John Wiley & Sons 1987.
- 44 R Core Team. *R: A Language and Environment for Statistical Computing*. Vienna, Austria: R Foundation for Statistical Computing; 2014. <http://www.R-project.org/>.
- 45 Rosseel Y. lavaan: An R Package for Structural Equation Modeling. *J Stat Softw* 2012;48:1–36. <http://www.jstatsoft.org/v48/i02/> (accessed 2 Nov 2015). doi:10.18637/jss.v048.i02.

- 1  
2  
3 46 Buuren Sv, Groothuis-Oudshoorn K. mice: Multivariate Imputation by Chained Equations in  
4 R. *J Stat Softw* 2011;45:1–67.  
5  
6  
7 47 Breheny P, Burchett W. visreg: Visualization of Regression Models; 2015. R package version  
8 2.1-1. <http://CRAN.R-project.org/package=visreg> (accessed 22 May 2015).  
9  
10 48 Head J, Kivimäki M, Martikainen P, et al. Influence of change in psychosocial work  
11 characteristics on sickness absence: the Whitehall II study. *J Epidemiol Community Health*  
12 2006;60:55–61. doi:10.1136/jech.2005.038752.  
13  
14 49 Kuper H, Marmot M. Job strain, job demands, decision latitude, and risk of coronary heart  
15 disease within the Whitehall II study. *J Epidemiol Community Health* 2003;57:147–153.  
16 doi:10.1136/jech.57.2.147.  
17  
18 50 Godin I, Kittel F, Coppieters Y, et al. A prospective study of cumulative job stress in relation  
19 to mental health. *BMC Public Health* 2005;5:67. doi:10.1186/1471-2458-5-67.  
20  
21 51 Stansfeld SA, Fuhrer R, Shipley MJ, et al. Work characteristics predict psychiatric disorder:  
22 prospective results from the Whitehall II Study. *Occup Environ Med* 1999;56:302–307.  
23 doi:10.1136/oem.56.5.302.  
24  
25 52 Harding JL, Backholer K, Williams ED, et al. Psychosocial stress is positively associated  
26 with body mass index gain over 5 years: evidence from the longitudinal AusDiab study.  
27 *Obesity* 2014;22:277–286. doi:10.1002/oby.20423.  
28  
29 53 Lallukka T, Laaksonen M, Martikainen P, et al. Psychosocial working conditions and weight  
30 gain among employees. *Int J Obes* 2005;29:909–915. doi:10.1038/sj.ijo.0802962.  
31  
32 54 Kivimäki M, Head J, Ferrie J, et al. Work stress, weight gain and weight loss: evidence for  
33 bidirectional effects of job strain on body mass index in the Whitehall II study. *Int J Obesity*  
34 2006;30:982–987. doi:10.1038/sj.ijo.0803229.  
35  
36 55 Brown JD. Staying fit and staying well: Physical fitness as a moderator of life stress. *J Pers*  
37 *Soc Psychol* 1991;60:555–561. doi:10.1037/0022-3514.60.4.555.  
38  
39 56 Ensel WM, Lin N. Physical fitness and the stress process. *J Commun Psychol*  
40 2004;32:81–101. doi:10.1002/jcop.10079.  
41  
42 57 Crews DJ, Landers DM. A meta-analytic review of aerobic fitness and reactivity to  
43 psychosocial stressors. *Med Sci Sports Exerc* 1987;19:114–120. doi:10.1249/00005768-  
44 198710001-00004.  
45  
46  
47  
48  
49  
50  
51  
52  
53  
54  
55  
56  
57  
58  
59  
60

- 1  
2  
3  
4 58 McEwen BS. Protective and damaging effects of stress mediators. *New Engl J Med*  
5 1998;338:171–179. doi:10.1056/NEJM199801153380307.  
6  
7 59 Freidl W, Rásky E, Stronegger WJ. Operationalisation of a demand/resource model of health:  
8 an explorative study. *J Epidemiol Commun H* 1999;53:187–188.  
9  
10 60 Kontinen H, Silventoinen K, Sarlio-Lähteenkorva S, et al. Emotional eating and physical  
11 activity selfefficacy as pathways in the association between depressive symptoms and  
12 adiposity indicators. *Am J Clin Nutr* 2010;92:1031–1039. doi:10.3945/ajcn.2010.29732.  
13  
14  
15  
16  
17  
18  
19  
20  
21  
22  
23  
24  
25  
26  
27  
28  
29  
30  
31  
32  
33  
34  
35  
36  
37  
38  
39  
40  
41  
42  
43  
44  
45  
46  
47  
48  
49  
50  
51  
52  
53  
54  
55  
56  
57  
58  
59  
60



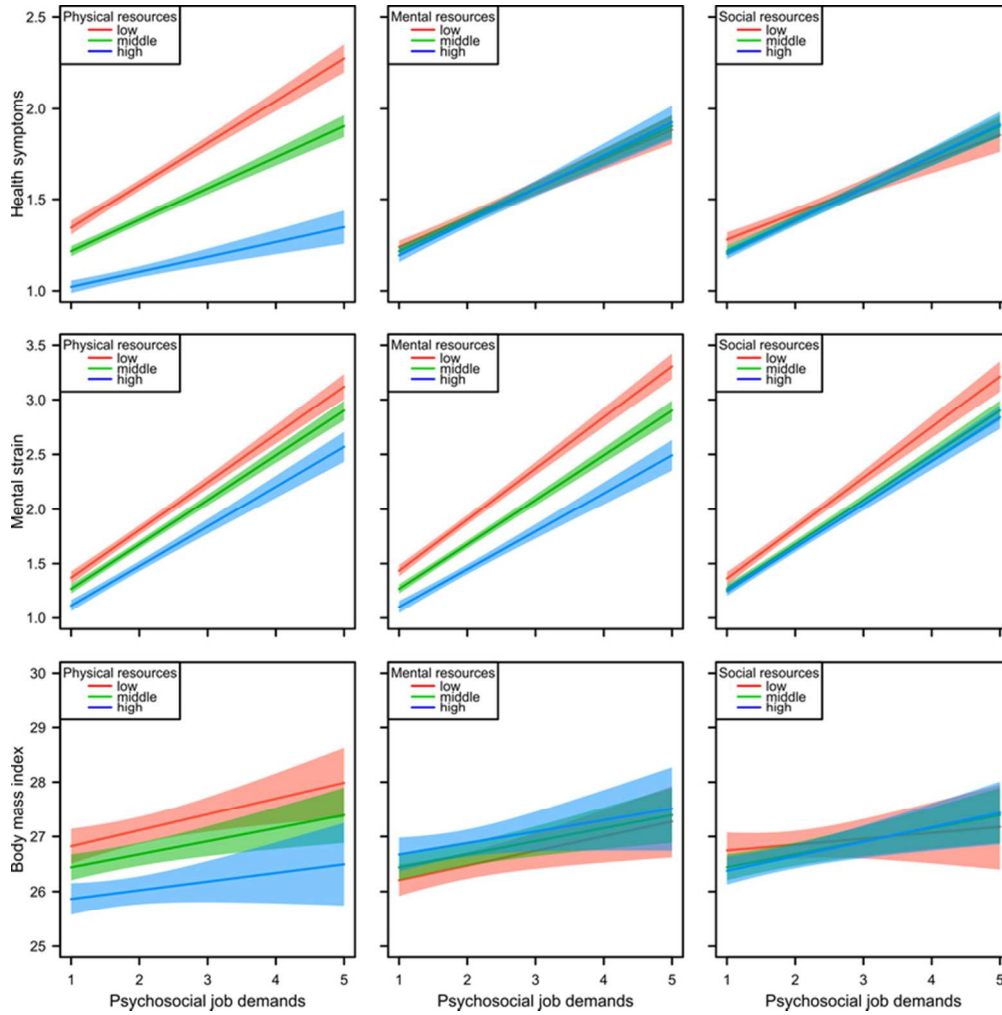

Prediction of the health outcomes as a function of psychosocial job demands and personal resources. The figures show the predicted lines (Model III) with 99% confidence bands for health symptoms, mental strain, and BMI. The coloured lines refer to the classification of the personal resources in low (10th quantile), middle (50th quantile), and high (90th quantile) values. The figures are based on the first imputed complete data set.

70x70mm (300 x 300 DPI)

## Supplementary material: Descriptive statistics and correlations

| Variable                              | <i>M (SD) / frequency</i> | Missing values (%) | 1           | 2           | 3            | 4     | 5     | 6    | 7     | 8    | 9     | 10   | 11 |
|---------------------------------------|---------------------------|--------------------|-------------|-------------|--------------|-------|-------|------|-------|------|-------|------|----|
| <b>1 Health symptoms</b>              | 1.44 (0.49)               | 0.08               | -           |             |              |       |       |      |       |      |       |      |    |
| <b>2 Mental strain</b>                | 1.81 (0.79)               | 3.26               | 0.48        | -           |              |       |       |      |       |      |       |      |    |
| <b>3 Body mass index</b>              | 24.82 (3.5)               | 1.95               | 0.14        | 0.07        | -            |       |       |      |       |      |       |      |    |
| <b>4 Job demands</b>                  | 1.86 (0.74)               | 0.79               | 0.41        | 0.55        | 0.08         | -     |       |      |       |      |       |      |    |
| <b>5 Personal resources: physical</b> | 4.12 (0.63)               | 0.19               | -0.53       | -0.42       | -0.18        | -0.35 | -     |      |       |      |       |      |    |
| <b>6 Personal resources: mental</b>   | 3.85 (0.79)               | 2.68               | -0.23       | -0.41       | 0.02         | -0.19 | 0.34  | -    |       |      |       |      |    |
| <b>7 Personal resources: social</b>   | 4.34 (0.84)               | 1.31               | -0.19       | -0.29       | -0.09        | -0.17 | 0.25  | 0.31 | -     |      |       |      |    |
| <b>8 Job resources: control</b>       | 3.77 (0.77)               | 3.17               | -0.31       | -0.36       | -0.01        | -0.34 | 0.4   | 0.4  | 0.26  | -    |       |      |    |
| <b>9 Job resources: rewards</b>       | 3.60 (0.86)               | 7.23               | -0.31       | -0.32       | -0.02        | -0.29 | 0.4   | 0.38 | 0.24  | 0.69 | -     |      |    |
| <b>10 Drinking</b>                    | 3.49 (1.51)               | 0.42               | -0.02       | 0.02        | 0.06         | 0.07  | -0.03 | 0.03 | 0.02  | 0.01 | -0.01 | -    |    |
| <b>11 Age</b>                         | 39.74 (11.28)             | -                  | 0.22        | 0.05        | 0.27         | 0.06  | -0.29 | 0.02 | -0.09 | 0.01 | 0     | 0.05 | -  |
| <b>12 Exercise</b>                    |                           | 0.15               |             |             |              |       |       |      |       |      |       |      |    |
| yes                                   | 3255                      |                    | 1.41 (0.46) | 1.74 (0.75) | 24.10 (3.33) |       |       |      |       |      |       |      |    |

|                          |      |      |                |                |                 |  |  |  |  |  |  |  |  |
|--------------------------|------|------|----------------|----------------|-----------------|--|--|--|--|--|--|--|--|
| no                       | 6165 |      | 1.45<br>(0.50) | 1.85<br>(0.80) | 25.20<br>(3.65) |  |  |  |  |  |  |  |  |
| <b>13 Diet</b>           |      | 0.15 |                |                |                 |  |  |  |  |  |  |  |  |
| healthy                  | 4436 |      | 1.45<br>(0.47) | 1.80<br>(0.76) | 24.05<br>(3.36) |  |  |  |  |  |  |  |  |
| unhealthy                | 4984 |      | 1.44<br>(0.50) | 1.81<br>(0.81) | 25.50<br>(3.64) |  |  |  |  |  |  |  |  |
| <b>14 Smoking</b>        |      | 0.43 |                |                |                 |  |  |  |  |  |  |  |  |
| no                       | 5385 |      | 1.43<br>(0.49) | 1.72<br>(0.74) | 24.72<br>(3.65) |  |  |  |  |  |  |  |  |
| yes                      | 4008 |      | 1.45<br>(0.49) | 1.93<br>(0.84) | 24.94<br>(3.50) |  |  |  |  |  |  |  |  |
| <b>15 Gender</b>         |      | -    |                |                |                 |  |  |  |  |  |  |  |  |
| male                     | 4772 |      | 1.39<br>(0.47) | 1.80<br>(0.79) | 25.77<br>(3.19) |  |  |  |  |  |  |  |  |
| female                   | 4662 |      | 1.49<br>(0.50) | 1.82<br>(0.79) | 23.81<br>(3.69) |  |  |  |  |  |  |  |  |
| <b>16 Education</b>      |      | -    |                |                |                 |  |  |  |  |  |  |  |  |
| compulsory               | 864  |      | 1.53<br>(0.56) | 2.12<br>(0.83) | 25.50<br>(3.99) |  |  |  |  |  |  |  |  |
| skilled/vocational       | 6116 |      | 1.42<br>(0.48) | 1.75<br>(0.75) | 24.99<br>(3.48) |  |  |  |  |  |  |  |  |
| high school              | 1251 |      | 1.43<br>(0.48) | 1.68<br>(0.70) | 24.39<br>(3.78) |  |  |  |  |  |  |  |  |
| academic                 | 1203 |      | 1.50<br>(0.48) | 2.04<br>(0.91) | 23.89<br>(3.36) |  |  |  |  |  |  |  |  |
| <b>17 Marital status</b> |      | -    |                |                |                 |  |  |  |  |  |  |  |  |

|                  |      |  |                |                |                 |  |  |  |  |  |  |  |  |
|------------------|------|--|----------------|----------------|-----------------|--|--|--|--|--|--|--|--|
| single           | 2468 |  | 1.37<br>(0.46) | 1.84<br>(0.84) | 24.26<br>(3.64) |  |  |  |  |  |  |  |  |
| partnership      | 5584 |  | 1.46<br>(0.49) | 1.81<br>(0.76) | 24.98<br>(3.51) |  |  |  |  |  |  |  |  |
| divorced/widowed | 1382 |  | 1.50<br>(0.53) | 1.75<br>(0.79) | 25.16<br>(3.65) |  |  |  |  |  |  |  |  |

Table notes. For the variables 1-11, we report the mean values (*M*), the standard deviations (*SD*), the proportions of missing values, and the correlation matrix. For the categorical variables, we report the frequencies, the proportions of missing values, and the mean values of the outcome variables for each group level (standard deviations in parentheses).

STROBE 2007 (v4) Statement—Checklist of items that should be included in reports of *cross-sectional studies*

| Section/Topic                | Item # | Recommendation                                                                                                                                                                       | Reported on page #                                 |
|------------------------------|--------|--------------------------------------------------------------------------------------------------------------------------------------------------------------------------------------|----------------------------------------------------|
| Title and abstract           | 1      | (a) Indicate the study's design with a commonly used term in the title or the abstract                                                                                               | Yes (see title)                                    |
|                              |        | (b) Provide in the abstract an informative and balanced summary of what was done and what was found                                                                                  | Yes (see abstract)                                 |
| <b>Introduction</b>          |        |                                                                                                                                                                                      |                                                    |
| Background/rationale         | 2      | Explain the scientific background and rationale for the investigation being reported                                                                                                 | p.2-4                                              |
| Objectives                   | 3      | State specific objectives, including any prespecified hypotheses                                                                                                                     | p.4                                                |
| <b>Methods</b>               |        |                                                                                                                                                                                      |                                                    |
| Study design                 | 4      | Present key elements of study design early in the paper                                                                                                                              | p.1 (see "Strength and limitations of this study") |
| Setting                      | 5      | Describe the setting, locations, and relevant dates, including periods of recruitment, exposure, follow-up, and data collection                                                      | p.5                                                |
| Participants                 | 6      | (a) Give the eligibility criteria, and the sources and methods of selection of participants                                                                                          | p.5                                                |
| Variables                    | 7      | Clearly define all outcomes, exposures, predictors, potential confounders, and effect modifiers. Give diagnostic criteria, if applicable                                             | p.5-8                                              |
| Data sources/<br>measurement | 8*     | For each variable of interest, give sources of data and details of methods of assessment (measurement). Describe comparability of assessment methods if there is more than one group | p.5-7                                              |
| Bias                         | 9      | Describe any efforts to address potential sources of bias                                                                                                                            | p.6                                                |
| Study size                   | 10     | Explain how the study size was arrived at                                                                                                                                            | p.5                                                |
| Quantitative variables       | 11     | Explain how quantitative variables were handled in the analyses. If applicable, describe which groupings were chosen and why                                                         | p.5-7                                              |
| Statistical methods          | 12     | (a) Describe all statistical methods, including those used to control for confounding                                                                                                | p.7                                                |
|                              |        | (b) Describe any methods used to examine subgroups and interactions                                                                                                                  | p.7                                                |
|                              |        | (c) Explain how missing data were addressed                                                                                                                                          | p.7-8                                              |
|                              |        | (d) If applicable, describe analytical methods taking account of sampling strategy                                                                                                   | Not applicable                                     |

|                          |     |                                                                                                                                                                                                              |                                 |
|--------------------------|-----|--------------------------------------------------------------------------------------------------------------------------------------------------------------------------------------------------------------|---------------------------------|
|                          |     | (e) Describe any sensitivity analyses                                                                                                                                                                        | Not applicable                  |
| <b>Results</b>           |     |                                                                                                                                                                                                              |                                 |
| Participants             | 13* | (a) Report numbers of individuals at each stage of study—eg numbers potentially eligible, examined for eligibility, confirmed eligible, included in the study, completing follow-up, and analysed            | p.5                             |
|                          |     | (b) Give reasons for non-participation at each stage                                                                                                                                                         | p.5                             |
|                          |     | (c) Consider use of a flow diagram                                                                                                                                                                           | Not applicable                  |
| Descriptive data         | 14* | (a) Give characteristics of study participants (eg demographic, clinical, social) and information on exposures and potential confounders                                                                     | p.5 and Supplementary materials |
|                          |     | (b) Indicate number of participants with missing data for each variable of interest                                                                                                                          | See supplementary materials     |
| Outcome data             | 15* | Report numbers of outcome events or summary measures                                                                                                                                                         | See supplementary materials     |
| Main results             | 16  | (a) Give unadjusted estimates and, if applicable, confounder-adjusted estimates and their precision (eg, 95% confidence interval). Make clear which confounders were adjusted for and why they were included | See supplementary materials     |
|                          |     | (b) Report category boundaries when continuous variables were categorized                                                                                                                                    | See table notes of Figure 1     |
|                          |     | (c) If relevant, consider translating estimates of relative risk into absolute risk for a meaningful time period                                                                                             | Not applicable                  |
| Other analyses           | 17  | Report other analyses done—eg analyses of subgroups and interactions, and sensitivity analyses                                                                                                               | p.8-12                          |
| <b>Discussion</b>        |     |                                                                                                                                                                                                              |                                 |
| Key results              | 18  | Summarise key results with reference to study objectives                                                                                                                                                     | p.13-14                         |
| Limitations              | 19  | Discuss limitations of the study, taking into account sources of potential bias or imprecision. Discuss both direction and magnitude of any potential bias                                                   | p.14                            |
| Interpretation           | 20  | Give a cautious overall interpretation of results considering objectives, limitations, multiplicity of analyses, results from similar studies, and other relevant evidence                                   | p.13-14                         |
| Generalisability         | 21  | Discuss the generalisability (external validity) of the study results                                                                                                                                        | p.13-14                         |
| <b>Other information</b> |     |                                                                                                                                                                                                              |                                 |
| Funding                  | 22  | Give the source of funding and the role of the funders for the present study and, if applicable, for the original study on which the present article is based                                                | Not applicable                  |

1  
2 \*Give information separately for cases and controls in case-control studies and, if applicable, for exposed and unexposed groups in cohort and cross-sectional studies.  
3  
4

5 **Note:** An Explanation and Elaboration article discusses each checklist item and gives methodological background and published examples of transparent reporting. The STROBE  
6 checklist is best used in conjunction with this article (freely available on the Web sites of PLoS Medicine at <http://www.plosmedicine.org/>, Annals of Internal Medicine at  
7 <http://www.annals.org/>, and Epidemiology at <http://www.epidem.com/>). Information on the STROBE Initiative is available at [www.strobe-statement.org](http://www.strobe-statement.org).  
8  
9  
10  
11  
12  
13  
14  
15  
16  
17  
18  
19  
20  
21  
22  
23  
24  
25  
26  
27  
28  
29  
30  
31  
32  
33  
34  
35  
36  
37  
38  
39  
40  
41  
42  
43  
44  
45  
46  
47

For peer review only

# BMJ Open

## The moderating role of personal resources in the relationship between psychosocial job demands and health: A cross-sectional study

|                                 |                                                                                                                                                                                                                                                                                                                                                                                                                                                                                |
|---------------------------------|--------------------------------------------------------------------------------------------------------------------------------------------------------------------------------------------------------------------------------------------------------------------------------------------------------------------------------------------------------------------------------------------------------------------------------------------------------------------------------|
| Journal:                        | <i>BMJ Open</i>                                                                                                                                                                                                                                                                                                                                                                                                                                                                |
| Manuscript ID                   | bmjopen-2016-015710.R1                                                                                                                                                                                                                                                                                                                                                                                                                                                         |
| Article Type:                   | Research                                                                                                                                                                                                                                                                                                                                                                                                                                                                       |
| Date Submitted by the Author:   | 08-Jun-2017                                                                                                                                                                                                                                                                                                                                                                                                                                                                    |
| Complete List of Authors:       | Mayerl, Hannes; Medizinische Universität Graz, Institute of Social Medicine and Epidemiology<br>Stolz, Erwin; Medizinische Universität Graz, Institute of Social Medicine and Epidemiology<br>Großschädl, Franziska; Medizinische Universität Graz, Institute of Nursing Science<br>Rásky, Éva; Medizinische Universität Graz, Institute of Social Medicine and Epidemiology<br>Freidl, Wolfgang; Medizinische Universität Graz, Institute of Social Medicine and Epidemiology |
| <b>Primary Subject Heading</b>: | Public health                                                                                                                                                                                                                                                                                                                                                                                                                                                                  |
| Secondary Subject Heading:      | Occupational and environmental medicine                                                                                                                                                                                                                                                                                                                                                                                                                                        |
| Keywords:                       | Personal resources, Job resources, Job demands, Work-related health                                                                                                                                                                                                                                                                                                                                                                                                            |
|                                 |                                                                                                                                                                                                                                                                                                                                                                                                                                                                                |

SCHOLARONE™  
Manuscripts

only



1  
2  
3  
4  
5  
6  
7  
8  
9  
10  
11  
12  
13  
14  
15  
16  
17  
18  
19  
20  
21  
22  
23  
24  
25  
26  
27  
28  
29  
30  
31  
32  
33  
34  
35  
36  
37  
38  
39  
40  
41  
42  
43  
44  
45  
46  
47  
48  
49  
50  
51  
52  
53  
54  
55  
56  
57  
58  
59  
60

## The moderating role of personal resources in the relationship between psychosocial job demands and health: A cross-sectional study

Hannes Mayerl<sup>1</sup>, Erwin Stolz<sup>1</sup>, Franziska Großschädl<sup>2</sup>,  
Éva Rásky<sup>1</sup>, and Wolfgang Freidl<sup>1</sup>

<sup>1</sup>*Institute of Social Medicine and Epidemiology  
Medical University of Graz  
Universitaetsstrasse 6/I  
8010 Graz, Austria*

<sup>2</sup>*Institute of Nursing Science  
Medical University of Graz  
Billrothgasse 6  
8010 Graz, Austria*

To be submitted to  
*BMJ Open*

Word count: 4588

**Correspondence:** Correspondence concerning this article should be addressed to Hannes Mayerl, Institute of Social Medicine and Epidemiology, Medical University of Graz, Universitaetsstrasse 6/I, 8010 Graz, Austria. E-mail: [hannes.mayerl@medunigraz.at](mailto:hannes.mayerl@medunigraz.at), telephone: +43 (0) 316 380 7764, fax: +43 (0) 316 380 9665

# The moderating role of personal resources in the relationship between psychosocial job demands and health: A cross-sectional study

## ABSTRACT

**Objective** The main objective of this research was to investigate the buffering effects of an individual's physical, mental and social resources in the relationship between psychosocial job demands and: (1) health symptoms, (2) mental strain, and (3) the body mass index (BMI) respectively.

**Methods** We performed moderated regression analysis to examine data from a large cross-sectional survey of an Austrian employee sample ( $N=9,434$ ).

**Results** The results revealed a robust association between psychosocial job demands and health symptoms as well as mental strain, but only a weak relationship between psychosocial job demands and BMI. Although the personal resources showed a positive effect on health symptoms and mental strain, only weak evidence was found for the hypothesized interaction with psychosocial job demands. Solely the physical fitness of a person was found to mitigate the impact of psychosocial job demands on health symptoms.

**Conclusions** In conclusion, personal resources substantially accounted for the prediction of health. However, the interactions between psychosocial job demands and personal resources only slightly contributed to explaining the variation in health.

## STRENGTHS AND LIMITATIONS OF THIS STUDY

- The large and representative sample allowed us to make comprehensible inferences on the population of full-time employees in Austria.
- We designed an extensive regression model, which was apt to explain considerable proportions of the variation in health.
- Given the cross-sectional nature of this study, no claims can be made about causality.

## INTRODUCTION

In our modern society, the phenomenon of stress is ubiquitous. Especially psychosocial stressors represent a major risk factor for ill health[1]. Among other things, psychosocial stress was found to be related to musculoskeletal problems[2], psychosomatic complaints[3], sleep disturbances[4], and mental health issues[5]. More recent findings also suggested a relationship between chronic stress and weight gain[6, 7, 8], mediated through (neuro-)physiological processes[9, 10, 11], eating behaviour[12], and physical activity[13].

Particularly in a working context the relationship between stress and health has been extensively investigated and several models have been proposed in order to explain the origins of work-related stress and its consequences[14]. According to the job demands-control (JD-C) model[15, 16], stress reactions are supposed to be the consequence of a combination between high job demands and low autonomy at the workplace. A review of the JD-C model has shown good empirical support for health effects of job demands, but weak evidence for the hypothesized interaction between job demands and job control in predicting health[17].

Another widely used model is the effort-reward (ER) model[18]. This model maintains that stress reactions are due to the feeling that despite the high efforts made at work the reward (e.g. in terms of payment) remains insufficient. In a review, good empirical evidence was found for the negative impact of high efforts and low rewards combined, in terms of cardiovascular outcomes, psychosomatic symptoms, exhaustion, and well-being[19]. One limitation of the JD-C and the ER model is that they restrict themselves to specific types of demands or resources and thus these models lack flexibility[20].

One popular model integrating previous work-related stress concepts is the job demands-resources (JD-R) model[21]. Unlike the JD-C and the ER model, the JD-R model considers any combination of different types of job demands and job resources in predicting health and well-being[20]. Job demands relate to all job factors, that entail psychological or physical costs due to accelerated efforts. Job resources, by contrast, are defined as all physical, psychological, social, and organizational factors that are beneficial to goal attainment, reduce costs due to job demands, or facilitate growth and advancement[22, 21].

The JD-R model proposes two main effects[22]: the first effect is about health problems when individuals are exposed to high job demands beyond their resources. The second effect concerns the motivational aspects of job resources. Where resources are high, higher work engagement,

1  
2  
3 lower cynicism, and better job performance are expected[23]. In addition to these two main  
4 effects, the JD-R model predicts an interaction between job demands and job resources in  
5 explaining mental and somatic health: On the one hand, job resources are thought to have the  
6 potential to buffer the negative impact of job demands on health while, on the other hand,  
7 individuals working in low-resource environments are thought to be especially vulnerable to job  
8 demands. These assumptions were confirmed in a study demonstrating that the combination of  
9 low job resources and high job demands was associated with higher levels of burnout  
10 symptoms[24].

11  
12 A potential weakness of the JD-R model is that it focuses exclusively on job resources, while  
13 disregarding personal characteristics of individuals[20]. As most psychological stress models  
14 assume that the stress response depends on the interaction between the individual and its  
15 environment[14], extensions of the JD-R model have been proposed in order to include personal  
16 resources as well. While job resources refer to favourable factors in a person's working  
17 environment, personal resources relate to those aspects of the self that are associated with  
18 resilience[25]. An individual with a high amount of personal resources may perceive a specific  
19 situation as less demanding than a person low in personal resources, believing that the resources  
20 available to him/her would suffice to efficiently handle the situation and to cope with the  
21 consequences[26, 27]. Taking both job resources and personal resources into account, therefore,  
22 enables a better understanding of the stress phenomenon. Although the definition of personal  
23 resources implies the moderating effect of personal resources in the relationship between job  
24 demands and health, the empirical evidence for this effect remains rather weak and  
25 ambiguous[28].

26  
27 Previous studies with personal resources integrated in the JD-R model concentrated on mental  
28 aspects, such as self-efficacy, self-esteem, or optimism[28, 29, 30]. This may be considered to be  
29 a limitation, as the biological and social characteristics of individuals are neglected. For instance,  
30 it has been shown that physically fitter persons – although displaying a slightly higher reactivity to  
31 stress – showed quicker recovery from a stressful situation than people who were less fit[31].  
32 Additionally, in a recent experiment, physically fitter persons had a less strong inflammatory  
33 cytokine response to mental demands than persons with poor fitness[32]. These study results  
34 indicate that physical fitness may help to buffer the negative impact of excessive job demands on  
35 health. Furthermore, a meta-analysis has found social support to play a crucial role in the  
36  
37  
38  
39  
40  
41  
42  
43  
44  
45  
46  
47  
48  
49  
50  
51  
52  
53  
54  
55  
56  
57  
58  
59  
60

1  
2  
3 relationship between job demands and stress reactions[33]. The perception of being part of a  
4 social network or having friends who help in difficult situations is seen to be an important  
5 resource, with a capacity of buffering the influence of high demands on health outcomes. Thus,  
6 we defined personal resources in line with a bio-psycho-social way of thinking[34], as those  
7 biological, mental, and social aspects that may positively enhance an individual's resilience  
8 against several kinds of demands[35].  
9  
10  
11  
12  
13

### 14 **The current study**

15  
16 In our study, we operationalised job demands as the burden emanating from psychosocial  
17 demands at the workplace. These include those psychological and social aspects of the job that are  
18 subjectively experienced as demanding and require sustained efforts on the part of employees[21].  
19 As regards the personal resources, we used three indicators to account for biological, mental, and  
20 social aspects. More specifically speaking, we used the subjective evaluation of a person's  
21 physical fitness as an indicator for the biological aspect. The mental aspect referred to the concept  
22 of generalized self-efficacy, defined as a stable and global belief of being able to mobilize one's  
23 own skills in order to solve a specific problem or to attain a specific goal[36, 37]. As for the social  
24 component, we concentrated on social support outside of work.  
25  
26  
27  
28  
29  
30  
31  
32

33 The outcome variables in our study comprised aspects of both mental and somatic health. More  
34 concretely, the somatic health outcomes referred to self-reported health symptoms on the one hand  
35 and the body mass index (BMI) on the other hand. We used BMI as health outcome since the  
36 prevalence of obesity is increasing worldwide[38] and elucidating the determinants for increased  
37 weight is thus of major interest for public health. As regards mental strain reactions, we focused  
38 on irritation, alienation, and exhaustion. Irritation is seen as a state of mental impairment  
39 comprised of emotional irritation[39]. Alienation refers to psychological separation or  
40 estrangement from the self[40, 41]. Exhaustion is seen as the central quality of burnout,  
41 representing feelings of being depleted of one's resources[42].  
42  
43  
44  
45  
46  
47  
48  
49  
50

51 Against this backdrop, we defined three main hypotheses:  
52

- 53 1. Based on extensive evidence for a detrimental impact of high demands on health, we  
54 expected a positive linear relationship to exist between psychosocial job demands and the  
55 three health outcomes.  
56  
57  
58  
59  
60

2. As personal resources had been found to be a beneficial factor for health, we predicted that individuals high in personal resources would report less health symptoms, less mental strain, and lower body mass indices than those low in personal resources.
3. We hypothesized that the impact of psychosocial job demands on health would depend on the amount of personal resources available. That is, the consequences of psychosocial job demands on health outcomes would be less harmful for those availing of a great pool of personal resources. Thus, we expected each of the physical, mental, and social resources to moderate the relationships between psychosocial job demands and health outcomes.

## METHODS

### Data collection and participants

Data was collected among the Austrian working population by *The Institute for Empirical Social Studies (IFES)* on behalf of the *Upper Austrian Chamber of Labour* from 2012 to 2014. A sample consisting of 14,946 persons was drawn using proportionally stratified random sampling. Self-reported data concerning demographics, working conditions, and health-related characteristics was collected using the face-to-face structured interviewing method. Prior to the interview, participants were informed about the study objectives and on the confidentiality and anonymity of the collected data. Permission to interview was obtained in the form of verbal informed consent. Since the health-related items were only presented to employed (full-time) persons, the sample size reduced to  $N=9,434$  participants. 50.6% of the participants were male and the mean age across the sample was 39.7 years ( $SD=11.3$ ; range: 15-85 years). A rate of 9.2% had completed compulsory school, 64.8% were skilled workers with an apprenticeship certificate or had a graduation from a vocational school, 13.3% had a high school diploma, and 12.8% held a university degree.

### Measures

Items used in this research were partly derived from validated instruments, but were also selected as proxy measures representing the underlying constructs of interest. For the texts of all items used in this research as well as descriptive statistics and proportions of missing values for each measure, please refer to the information in the supplementary materials.

## Dependent variables

*Health symptoms* Participants were asked to indicate how often in the last weeks they had suffered from: (1) digestive problems, (2) headache/migraine, (3) sleep disturbances, (4) fatigue, (5) nervousness, (6) lack of concentration, (7) back pain, (8) leg pain, (9) hypertension, (10) tachycardia, (11) skin problems, (12) respiratory problems, or (13) chronic coughing. For each item, response categories ranged from “1=never” to “5=very often”.

*Mental strain* (1) To assess *irritation*, we included three items (e.g. “I anger quickly”) from the German Irritation Scale[43] developed for assessment of psychological strain in the context of work. (2) *Alienation* was operationalised with three items (e.g. “I often do not understand what is actually happening”) based on a subscale assessing the subjective feeling of being estranged from the self[44]. (3) The burnout dimension *emotional exhaustion*[45] was measured with three items in total (e.g. “I feel exhausted due to work”). For each item measuring mental strain, response categories ranged from “1=I do not agree” to “5=I strongly agree”.

*Body mass index* The BMI was calculated for each participant as the body weight (in kilograms), divided by the square of body height (in meters). The figures for body height and weight are based on self-reported data.

## Independent variables

*Psychosocial job demands* To assess psychosocial job demands, we used six items measuring the burden due to both psychological and social aspects at the workplace. Participants had to rate, on a 5-point scale (“1=not stressed” to “5=strongly stressed”), how strongly they felt burdened by (1) isolation at the workplace, (2) time pressure, (3) emotionally burdening and annoying work, (4) high responsibility for goods and people, (5) changes in work routines, and (6) irregular working hours.

*Personal resources* (1) Physical: We used two items defining physical constitution (e.g. “How would you assess your physical fitness?”) as an indicator for physical resources, measured on a five-point rating scale (from “1=very poor” to “5=very good”). (2) Mental: The mental component referred to the construct of self-efficacy, which was measured using three items (response

1  
2  
3 categories ranging from “1=I do not agree” to “5=I strongly agree”) from a German version of the  
4  
5 “Generalized Self-efficacy Scale” (e.g. “I can always manage to solve difficult problems if I try  
6  
7 hard enough”)[46, 47]. (3) Social: The social component was operationalised by three items (5-  
8  
9 point rating scale ranging from “1=I do not agree” to “5=I strongly agree”) assessing social  
10  
11 support (e.g. “I have persons beyond my immediate family circle, on whom I can count in case of  
12  
13 emergency”).

14  
15  
16 *Job resources* (1) Job control was assessed using three items (e.g. “How satisfied are you with the  
17  
18 possibilities to decide on work processes.”) measuring the amount of autonomy and decision  
19  
20 latitude at work. (2) Job rewards were operationalised by three items assessing satisfaction with  
21  
22 (1) income, (2) occupational training opportunities, and (3) career and development opportunities.  
23  
24 For all items, response categories ranged from “1=not at all satisfied” to “5=very satisfied”. We  
25  
26 included job control and job rewards since these factors relate to the currently leading job stress  
27  
28 models used in health psychology [14, 20] (along with the JD-R model), namely the JD-C  
29  
30 model[15] and the ER model[18].

31  
32 *Health behaviour* To measure health-related risk behaviour, we included dichotomous  
33  
34 answers for items assessing whether participants performed regular exercise in their leisure time  
35  
36 (“0=yes”/”1=no”), ate healthy food (“0=yes”/”1=no”), or smoked (“0=not at all”/”1=occasionally  
37  
38 or regularly”). These variables were treated as dummy variables. Additionally, participants were  
39  
40 asked to indicate, on a six-point scale (from “1=not at all” to “6=nearly every day”), how often  
41  
42 they consumed alcohol.

43  
44 We calculated estimates for health symptoms, job demands, and each subscale of the personal and  
45  
46 job resources by averaging the respective raw scores. As regards to mental strain, we averaged the  
47  
48 mean scores for irritation, alienation, and exhaustion to obtain an estimate for mental strain. All of  
49  
50 these mean scores were subsequently used in our regression models. In order to examine the  
51  
52 psychometric properties of these scales we conducted confirmatory factor analysis and estimated  
53  
54 reliability.

## 55 56 57 **Psychometric and statistical analysis**

58  
59  
60



## Psychometric analysis

We performed confirmatory factor analysis (CFA) to examine the dimensionality of the scales for health symptoms, mental strain, job demands, personal resources, and job resources. We relied on polychoric correlations and diagonally weighted least squares estimation with robust test statistics (WLSMV estimation)[48, 49]. To evaluate model-fit, we focused on the Comparative Fit Index (*CFI*), the Tucker Lewis Index (*TLI*), and the Root Mean Square Error of Approximation (*RMSEA*). Values  $\geq 0.95$  of the *CFI* and the *TLI*, and values  $\leq 0.06$  of the *RMSEA* were defined as sufficient[50]. Since CFA models with a total of two or three indicators were saturated, we only state the range of the factor loadings.

## Regression analysis

To test our hypotheses, we used multiple linear regression analysis and moderated regression analysis. As we were interested in the relative importance of the three personal resources and their moderating effects, we applied a hierarchical approach: In Model I, we regressed each of the three dependent variables on all independent variables except for the personal resources. In Model II, the personal resources were added to the regression models as predictors, and in Model III, we additionally considered the interactions between the three personal resources and job demands by including the product terms of the corresponding scores.

To handle missing data (1.28% in total), we applied multiple imputation by chained equations. Each regression analysis was repeated for the  $m=20$  imputed data sets and the results were pooled according to Rubin's rules[51]. All psychometric and statistical analyses were carried out with R 3.1.2[52]. CFA was done using the R-package lavaan 0.5-17[53] while multiple imputation was carried out using the R-package mice 2.22[54]. Due to the large sample size, we set the significance threshold for hypothesis testing to  $\alpha=1\%$ .

## RESULTS

### Psychometric analysis

*Health symptoms* The one-factor model for health symptoms fitted the data sufficiently well ( $\chi^2(65)=2058.5$ ,  $p<0.001$ ; *CFI*=0.959; *TLI*=0.951; *RMSEA*=0.057) and internal consistency was good (Cronbach's  $\alpha=0.93$ ).

1  
2  
3 *Mental strain* The model for mental strain consisted of three first-order factors – irritation,  
4 alienation, and exhaustion – that form the second-order factor mental strain. This model  
5 adequately fitted the data ( $\chi^2(24)=568.7, p < 0.001; CFI=0.998; TLI=0.997; RMSEA=0.049$ ) and  
6  
7 internal consistency of the second-order factor was acceptable ( $\alpha=0.76$ ).  
8  
9

10  
11  
12 *Psychosocial job demands* For psychosocial job demands, we tested a one-factor model. The  
13 indices confirmed model fit ( $\chi^2(9)=257.7, p < 0.001; CFI=0.990; TLI=0.984; RMSEA=0.054$ ) and  
14 internal consistency was sufficient ( $\alpha=0.84$ ).  
15  
16

17  
18  
19 *Personal resources* (1) Physical: The factor loadings of the items measuring the physical  
20 component were  $\lambda=0.75$  and  $\lambda=0.89$ . (2) Mental: The correlations between the latent factor and  
21 the items measuring self-efficacy were between  $\lambda=0.81$  and  $\lambda=0.86$ . (3) Social: The factor  
22 loadings of the items assessing social support ranged from  $\lambda=0.88$  to  $\lambda=0.91$ . Internal consistency  
23 for the physical ( $\alpha=0.88$ ), the mental ( $\alpha=0.87$ ), and the social ( $\alpha=0.93$ ) component was good.  
24  
25  
26  
27

28  
29  
30 *Job resources* (1) Job control: The items measuring job control loaded on the latent factor in a  
31 range between  $\lambda=0.56$  and  $\lambda=0.89$ . (2) Job rewards: The factor loadings of the items assessing job  
32 rewards ranged from  $\lambda=0.54$  to  $\lambda=0.91$ . Internal consistency for job control ( $\alpha=0.79$ ) and job  
33 rewards ( $\alpha=0.81$ ) was sufficient.  
34  
35  
36  
37

## 38 Regression analysis

39  
40 An overview of the coefficients of determination for the Models I-III can be found in Table 1. We  
41 found that adding the three personal resources as predictors in Model II has significantly improved  
42 the prediction for health symptoms, mental strain, and BMI. By additionally including the product  
43 terms between psychosocial job demands and each of the three personal resources as predictors in  
44 the third step, the predictions for health symptoms and mental strain were significantly enhanced  
45 when compared to the models in the second step. As for BMI, the inclusion of the product terms  
46 in the third step did not significantly increase the coefficient of determination. In the next  
47 paragraphs we report the regression coefficients for Model III, including all predictors and  
48 interactions.  
49  
50  
51  
52  
53  
54  
55  
56  
57  
58  
59  
60

Table 1: Coefficients of determination for the Models I-III

| Model | Health symptoms |              |                         |        | Mental strain |              |                         |        | Body mass index |              |                         |        |
|-------|-----------------|--------------|-------------------------|--------|---------------|--------------|-------------------------|--------|-----------------|--------------|-------------------------|--------|
|       | $R^2$           | $\Delta R^2$ | $F$<br>( $df_1, df_2$ ) | $p$    | $R^2$         | $\Delta R^2$ | $F$<br>( $df_1, df_2$ ) | $p$    | $R^2$           | $\Delta R^2$ | $F$<br>( $df_1, df_2$ ) | $p$    |
| I     | 0.273           |              |                         |        | 0.361         |              |                         |        | 0.189           |              |                         |        |
| II    | 0.363           | 0.090        | 429.2<br>(3, 57332)     | <0.001 | 0.446         | 0.086        | 458.1<br>(3, 14287)     | <0.001 | 0.198           | 0.010        | 37.8<br>(3, 21153)      | <0.001 |
| III   | 0.369           | 0.006        | 30.9<br>(3, 51186)      | <0.001 | 0.452         | 0.005        | 28.6<br>(3, 6300)       | <0.001 | 0.198           | 0.000        | 0.5<br>(3, 12919)       | 0.720  |

Table notes. Model I includes all predictors except for the personal resources. In Model II the personal resources were added and in Model III we additionally considered the interactions between the personal resources and psychosocial job demands.

*Health symptoms* Listed in Table 2 are the results of the multiple regression analysis for health symptoms. There was a significant effect of psychosocial job demands on health symptoms, i.e. higher amounts of job demands were accompanied with higher levels of health symptoms. Among the personal resources, the physical component had the relatively highest explanatory value, while there was an insignificant effect for the mental component and a significant but relatively weak effect for the social component.

Table 2: Regression coefficients for health symptoms, mental strain, and BMI.

|                    | Health symptoms      |        | Mental strain        |        | Body mass index      |        |
|--------------------|----------------------|--------|----------------------|--------|----------------------|--------|
|                    | $\beta$ [99% CI]     | $p$    | $\beta$ [99% CI]     | $p$    | $\beta$ [99% CI]     | $p$    |
| (Intercept)        | -0.53 [-0.67, -0.40] | <0.001 | 0.06 [-0.07, 0.19]   | 0.229  | -0.59 [-0.74, -0.44] | <0.001 |
| Job demands        | 0.23 [0.21, 0.26]    | <0.001 | 0.39 [0.37, 0.42]    | <0.001 | 0.04 [0.01, 0.07]    | <0.001 |
| Personal resources |                      |        |                      |        |                      |        |
| Physical           | -0.34 [-0.36, -0.31] | <0.001 | -0.16 [-0.19, -0.14] | <0.001 | -0.11 [-0.14, -0.08] | <0.001 |
| Mental             | -0.02 [-0.05, 0.00]  | 0.014  | -0.23 [-0.25, -0.20] | <0.001 | 0.05 [0.02, 0.08]    | <0.001 |
| Social             | -0.04 [-0.06, -0.02] | <0.001 | -0.09 [-0.11, -0.07] | <0.001 | -0.03 [-0.05, 0.00]  | 0.009  |
| Job resources      |                      |        |                      |        |                      |        |
| Control            | -0.02 [-0.06, 0.01]  | 0.050  | -0.03 [-0.06, 0.00]  | 0.003  | 0.04 [0.00, 0.07]    | 0.012  |
| Rewards            | -0.09 [-0.12, -0.06] | <0.001 | -0.02 [-0.05, 0.01]  | 0.156  | 0.01 [-0.02, 0.05]   | 0.297  |

|                                         |                      |        |                      |        |                      |        |
|-----------------------------------------|----------------------|--------|----------------------|--------|----------------------|--------|
| <b>Health behaviour</b>                 |                      |        |                      |        |                      |        |
| <b>Exercise (ref.: yes)</b>             |                      |        |                      |        |                      |        |
| <b>Exercise (no)</b>                    | -0.11 [-0.16, -0.07] | <0.001 | 0.00 [-0.04, 0.05]   | 0.887  | 0.18 [0.12, 0.23]    | <0.001 |
| <b>Diet (ref.: healthy)</b>             |                      |        |                      |        |                      |        |
| <b>Diet (unhealthy)</b>                 | -0.01 [-0.06, 0.03]  | 0.434  | -0.05 [-0.10, -0.01] | 0.002  | 0.29 [0.24, 0.34]    | <0.001 |
| <b>Smoking (ref.: no)</b>               |                      |        |                      |        |                      |        |
| <b>Smoking (yes)</b>                    | 0.01 [-0.04, 0.05]   | 0.754  | 0.14 [0.10, 0.18]    | <0.001 | -0.04 [-0.09, 0.02]  | 0.074  |
| <b>Drinking</b>                         | 0.00 [-0.02, 0.01]   | 0.499  | 0.00 [-0.02, 0.01]   | 0.383  | -0.03 [-0.05, -0.01] | <0.001 |
| <b>Gender (ref.: male)</b>              |                      |        |                      |        |                      |        |
| <b>Gender (female)</b>                  | 0.23 [0.19, 0.28]    | <0.001 | 0.05 [0.00, 0.09]    | 0.006  | -0.49 [-0.54, -0.43] | <0.001 |
| <b>Age</b>                              | 0.01 [0.01, 0.01]    | <0.001 | 0.00 [-0.00, 0.00]   | 0.112  | 0.02 [0.02, 0.02]    | <0.001 |
| <b>Education (ref.: compulsory)</b>     |                      |        |                      |        |                      |        |
| <b>Education (skilled/vocational)</b>   | 0.04 [-0.03, 0.12]   | 0.141  | -0.11 [-0.19, -0.04] | <0.001 | -0.05 [-0.14, 0.03]  | 0.114  |
| <b>Education (high school)</b>          | 0.10 [0.01, 0.20]    | 0.005  | -0.15 [-0.25, -0.06] | <0.001 | -0.12 [-0.23, -0.02] | 0.003  |
| <b>Education (academic)</b>             | 0.08 [-0.02, 0.18]   | 0.036  | 0.11 [0.02, 0.20]    | 0.003  | -0.28 [-0.39, -0.17] | <0.001 |
| <b>Marital status (ref.: single)</b>    |                      |        |                      |        |                      |        |
| <b>Marital status (partnership)</b>     | -0.03 [-0.09, 0.02]  | 0.116  | -0.11 [-0.16, -0.06] | <0.001 | -0.02 [-0.08, 0.04]  | 0.475  |
| <b>Marital status (div./wid.)</b>       | -0.05 [-0.12, 0.03]  | 0.124  | -0.18 [-0.25, -0.11] | <0.001 | -0.09 [-0.18, -0.00] | 0.009  |
| <b>Job demands × Physical resources</b> | -0.08 [-0.10, -0.06] | <0.001 | -0.02 [-0.04, -0.00] | 0.005  | -0.01 [-0.03, 0.02]  | 0.554  |
| <b>Job demands × Mental resources</b>   | 0.01 [-0.02, 0.03]   | 0.412  | -0.05 [-0.07, -0.03] | <0.001 | 0.00 [-0.03, 0.02]   | 0.760  |
| <b>Job demands × Social resources</b>   | 0.02 [0.00, 0.04]    | 0.024  | -0.03 [-0.05, -0.00] | 0.002  | 0.01 [-0.02, 0.04]   | 0.288  |

Table notes.  $N=9,434$ . This table shows the pooled regression coefficients for health symptoms, mental strain, and BMI respectively. All coefficients presented here were controlled for the remaining predictors in the model. For these coefficients, we also show the  $100(1 - \alpha)\%$  confidence intervals (*CI*). Health symptoms, mental strain, BMI, job demands, personal resources, and job resources were included as standardized measures. Categorical variables were included as dummy variables. ref.=reference group. div.=divorced. wid.=widowed.

However, physical resources also interacted with job demands. To clarify this interaction, Figure 1 shows the simple slopes of psychosocial job demands for low (10th quantile), middle (50th

1  
2  
3  
4  
5  
6  
7  
8  
9  
10  
11  
12  
13  
14  
15  
16  
17  
18  
19  
20  
21  
22  
23  
24  
25  
26  
27  
28  
29  
30  
31  
32  
33  
34  
35  
36  
37  
38  
39  
40  
41  
42  
43  
44  
45  
46  
47  
48  
49  
50  
51  
52  
53  
54  
55  
56  
57  
58  
59  
60

quantile), and high (90<sup>th</sup> quantile) values for personal resources. As seen in the first row on the left, persons high in physical resources are expected to have less health symptoms than persons low in physical resources. Moreover, good physical fitness seemed to buffer the impact of job demands on health symptoms. The predicted values for health symptoms increased less strongly as a function of psychosocial job demands in those high in physical resources than in those low in physical resources. Looking at the central and the right figure in the first row, neither a difference in health symptoms between the three lines nor a clear interaction effect between the personal resources and psychosocial job demands is evident.

Returning to Table 2: for the job resources we found a significant effect only for job rewards. That is, persons who reported more rewards reported less health symptoms. Among the health-related behaviours only the variable exercise was related to health symptoms. Persons who actively practised sports stated more health symptoms than those not actively practising sports. Furthermore, the health status worsened with increased age, and, overall, women (vs. men) and employees with a high school diploma (vs. compulsory education) reported more health symptoms, respectively. Marital status showed no impact.

*Mental strain* As seen in Table 2, psychosocial job demands had a relatively strong relation to mental strain. On the other hand, there were negative effects for the physical, mental, and social components of personal resources, respectively. However, we also found an interaction effect between job demands and personal resources. The second row of Figure 1 reveals higher levels of mental strain in those low in personal resources than in those high in personal resources, whereby the difference was greater for the physical and mental components and smaller for the social component. However, the interaction effects appear to be relatively weak and the practical implications are questionable.

As for the job resources, higher job control was related to less mental strain. Among the health-related behaviours the variables diet and smoking were related to mental strain. Unhealthy diet and smoking seemed to be accompanied with higher levels of mental strain. In general, women indicated to experience more mental strain than men. Age in turn had no impact. Considering the educational level, university graduates (vs. employees with compulsory education) indicated higher levels of mental strain, and skilled workers/graduates from a vocational school and workers with a high school diploma reported less levels of mental strain. Regarding marital status, persons

1  
2  
3 in a partnership as well as divorced/widowed persons reported lower levels of mental strain than  
4  
5 singles.  
6  
7

8  
9 *Body mass index* Although there was a significant positive relationship between psychosocial  
10 job demands and BMI, the effect was less strong than for health symptoms and mental strain. The  
11 findings concerning the personal resources were ambiguous. Physical and social resources were  
12 negatively associated with BMI and mental resources were positively related to BMI.  
13 Additionally, none of the interactions between psychosocial job demands and either of the three  
14 personal resources were significant (also see Figure 1, third row).  
15  
16

17  
18 Regarding job resources, we found that persons who reported higher job control had a higher  
19 BMI. Hardly surprisingly was health-related behaviour related to BMI. Unhealthy diet and lack of  
20 exercise were accompanied by a higher BMI. Smoking was not related to BMI, and alcohol  
21 consumption was negatively related to BMI. Furthermore, university graduates and workers with a  
22 high school diploma had a lower BMI than workers with compulsory education. In addition,  
23 divorced/widowed persons had a lower BMI than singles.  
24  
25  
26  
27  
28  
29  
30

## 31 **DISCUSSION**

32  
33 The main objective of this study was to uncover physical, mental, and social resources that can be  
34 beneficial in maintaining individual health despite a high burden due to psychosocial demands  
35 experienced at the workplace. In line with the first hypothesis, we found a robust positive  
36 association between psychosocial job demands and health symptoms as well as mental strain.  
37 These study results support previous prospective studies demonstrating that people working in  
38 psychosocially demanding environments have a greater risk for somatic[55, 56] and mental health  
39 issues[57, 58]. We also expected to find a positive relationship between psychosocial job demands  
40 and BMI[7, 59]. However, although this effect was significant, the relative explanatory value was  
41 low in comparison to other predictors in the model. The reason for this weak effect may be due to  
42 a bidirectional impact of job demands on body weight. This means that the burden due to high job  
43 demands may cause some people to reduce their food intake and lose weight and other people to  
44 eat more and gain weight. Indeed, in a longitudinal study, work-related stress showed an increase  
45 of the BMI in overweight persons but a reduction in lean persons[60].  
46  
47  
48  
49  
50  
51  
52  
53  
54  
55  
56  
57  
58  
59  
60

1  
2  
3 The findings for the second and third main hypotheses are discussed in more detail below. For  
4 health symptoms, a relatively clear relationship was found with physical resources. On the one  
5 hand, we found that persons high in physical fitness reported less health symptoms than those low  
6 in physical fitness, and on the other hand, that physical fitness seem to be a beneficial factor  
7 buffering the negative influences of psychosocial job demands on health. These results support  
8 previous conclusions concerning physical fitness as a crucial factor in the relationship between  
9 stress and somatic health and well-being[61, 62]. It may be argued that fitter persons are more  
10 able to cope with psychosocial demands while exhibiting a less strong physiological activation  
11 which otherwise, in the long term, may result in bodily damages[63, 64]. Our findings must,  
12 however, be interpreted with some caution. This cross-sectional study does not allow us to tell  
13 cause from effect, so longitudinal studies will be needed to examine the effect the interaction  
14 between physical resources and job demands has on health over time. We also expected the  
15 mental and social resources of an individual to be further factors for buffering the negative impact  
16 of psychosocial job demands on health symptoms. However, we did not find any effect that was  
17 strong enough to have practical implications.  
18  
19

20  
21 For mental strain, our findings regarding the predicted positive effects of personal resources were  
22 relatively straightforward. In other words, physical fitness, the confidence in one's own abilities,  
23 and a helpful circle of friends appeared to promote mental health[35, 65]. However, although the  
24 hypothesized interaction effects were significant, they remained small. Regarding the relationship  
25 between BMI and personal resources, there was only one result confirming our hypotheses in that  
26 we found a negative association between BMI and physical resources. Little surprisingly,  
27 individuals feeling physically fit had a lower BMI than those with poor physical fitness. On the  
28 other hand, higher levels of mental resources were accompanied by a slightly higher BMI. This  
29 result somewhat contradicted the results of previous studies. For example, in a recent study it has  
30 been found that individuals high in self-efficacy had a lower BMI than those low in self-  
31 efficacy[66]. Moreover, in terms of the hypothesized moderating effect of personal resources, we  
32 did not find a significant result.  
33  
34

35  
36 Overall, we found that including the personal resources substantially improved the prediction for  
37 health symptoms and mental strain. These findings clearly support recent approaches of  
38 considering personal resources in work-related stress models[28, 29]. On the other hand, by  
39 adding the interactions between psychosocial job demands and the personal resources, the change  
40  
41  
42  
43  
44  
45  
46  
47  
48  
49  
50

1  
2  
3 of explained variance was relatively weak. Hence, it remains questionable whether personal  
4 resources should be treated as moderators in the relationship between job demands and health.  
5  
6 Apart from the buffering effect found for physical resources regarding the impact of psychosocial  
7 job demands on health symptoms, the interaction effects only slightly contributed to the  
8 prediction.  
9  
10  
11

## 12 13 14 **Strengths and limitations**

15  
16 One shortcoming of our study concerns its cross-sectional nature. The effects are only  
17 correlational and no causal inferences can be made. Longitudinal studies will thus be needed in  
18 order to investigate the causal relationships between job demands, health, and the different  
19 components of personal resources. A further limitation might reside in the self-reported character  
20 of the analysed data and in the fact that the measures yielded only approximate indices of the  
21 respective underlying constructs. More objective and standardized measures (e.g. physical fitness  
22 tests as an indicator for physical resources) might have led to more reliable findings. Furthermore,  
23 it might be considered a limitation that we used BMI as an indicator for health. Although  
24 increased weight is among the most significant contributors to morbidity and mortality[38], the  
25 BMI has been often criticized because it only considers weight and height and disregards other  
26 factors, such as muscle and bone mass or fat reserves. This might be one of the reasons why most  
27 studies in this context found only weak associations between stress and BMI.  
28  
29

30  
31 One strength of our research is that we designed an extensive model, which was apt to explain  
32 considerable proportions of the variation in mental strain (45%) and health symptoms (37%). A  
33 further strength of our study was the representative large-size sample, which allowed us to make  
34 comprehensible inferences to the working population in Austria. However, since we restricted our  
35 sample to employees working full-time, our findings only related to this group of individuals and  
36 no inferences can be made on other groups, such as part-time workers or the self-employed.  
37  
38  
39  
40  
41  
42  
43  
44  
45  
46  
47  
48

## 49 50 **Conclusion and practical implications**

51  
52 Three conclusions can be drawn:

- 53 1. High psychosocial job demands were related to higher levels of health symptoms and of  
54 mental strain.  
55  
56  
57  
58  
59  
60



2. Personal resources in a bio-psycho-social sense may be beneficial factors for somatic and mental health.
3. Concerning the moderating role of personal resources, we found that physical fitness seemed to attenuate the negative impact of psychosocial job demands on somatic health.

Our findings suggest that organizational goals should especially address the reduction of overwhelming psychosocial job demands in order to decrease work-related health problems. A further objective for health promotion concerns the empowerment of the employee's personal resources. In highly demanding working environments particularly high physical fitness of a person may have the potential to cushion the detrimental effects that psychosocial job demands have on somatic health. Thus the promotion of physical fitness is a higher purpose when it comes to preventing health problems in highly demanding jobs.

## ACKNOWLEDGEMENTS

We are grateful to the Upper Austrian Chamber of Labour for regularly collecting data in order to monitor work climate and mental and somatic health of employees. We would also like to thank them for the good cooperation and for providing us with the data.

## FOOTNOTES

### Contributors

HM, WF, and ES conceived and designed the study. HM, WF, and ES analysed the data. HM wrote the paper. WF, ES, FG, and ER critically reviewed drafts of the paper. HM, WF, ES, FG, and ER interpreted the study findings. All authors approved the final version of the manuscript.

### Funding

This research received no specific grant from any funding agency in the public, commercial or not-for-profit sectors.

### Competing interests

No competing interests.

**Ethics approval**

The Ethics Committee of the Medical University of Graz approved the conductance of this study (EK-number: 27-251 ex 14/15).

**Data sharing statement**

No additional data available.

For peer review only

**REFERENCES**

- 1 Nixon AE, Mazzola JJ, Bauer J, Krueger JR, Spector PE. Can work make you sick? A meta-analysis of the relationships between job stressors and physical symptoms. *Work Stress* 2011;25:1–22. doi:10.1080/02678373.2011.569175.
- 2 Bongers PM, de Winter CR, Kompier MA, Hildebrandt VH. Psychosocial factors at work and musculoskeletal disease. *Scand J Work Env Hea* 1993;19:297–312.
- 3 Frese M. Stress at work and psychosomatic complaints: a causal interpretation. *J Appl Psychol* 1985;70:314–328. doi:10.1037/0021-9010.70.2.314.
- 4 Åkerstedt T. Psychosocial stress and impaired sleep. *Scand J Work Env Hea* 2006;32:493–501. doi:10.5271/sjweh.1054.
- 5 Stansfeld S, Candy B. Psychosocial work environment and mental health—a meta-analytic review. *Scand J Work Env Hea* 2006;32:443–462. doi:10.5271/sjweh.1050.
- 6 Block JP, He Y, Zaslavsky AM, Ding L, Ayanian JZ. Psychosocial stress and change in weight among US adults. *Am J Epidemiol*. 2009;170:181–192. doi:10.1093/aje/kwp104.
- 7 Harding JL, Backholer K, Williams ED, Peeters A, Cameron AJ, Hare MJ, et al. Psychosocial stress is positively associated with body mass index gain over 5 years: evidence from the longitudinal AusDiab study. *Obesity* 2014;22:277–286. doi:10.1002/oby.20423.
- 8 Kouvonen A, Kivimäki M, Cox SJ, Cox T, Vahtera J. Relationship between work stress and body mass index among 45,810 female and male employees. *Psychosom Med* 2005;67:577–583. doi:10.1097/01.psy.0000170330.08704.62.
- 9 Hamer M, Stamatakis E. Inflammation as an intermediate pathway in the association between psychosocial stress and obesity. *Physiol Behav* 2008;94:536–539. doi:10.1016/j.physbeh.2008.03.010.
- 10 Jauch-Chara K, Oltmanns KM. Obesity—A neuropsychological disease? Systematic review and neuropsychological model. *Prog Neurobiol* 2014;114:84–101. doi:10.1016/j.pneurobio.2013.12.001.
- 11 Kyrou I, Tsigos C. Chronic stress, visceral obesity and gonadal dysfunction. *Hormones*. 2008;7:287–93.
- 12 Torres SJ, Nowson CA. Relationship between stress, eating behavior, and obesity. *Nutrition* 2007;23:887–894. doi:http://dx.doi.org/10.1016/j.nut.2007.08.008.

- 1  
2  
3  
4  
5  
6  
7  
8  
9  
10  
11  
12  
13  
14  
15  
16  
17  
18  
19  
20  
21  
22  
23  
24  
25  
26  
27  
28  
29  
30  
31  
32  
33  
34  
35  
36  
37  
38  
39  
40  
41  
42  
43  
44  
45  
46  
47  
48  
49  
50  
51  
52  
53  
54  
55  
56  
57  
58  
59  
60
- 13 Holmes ME, Ekkekakis P, Eisenmann JC. The physical activity, stress and metabolic syndrome triangle: a guide to unfamiliar territory for the obesity researcher. *Obesity Reviews* 2010;11:492–507. doi:10.1111/j.1467-789X.2009.00680.x.
- 14 Mark GM, Smith AP. Stress models: a review and suggested new direction. In: Houdmont J, Leka S, eds. *Occupational Health Psychology*. Nottingham: Nottingham University Press 2008:111–144.
- 15 Karasek RA. Job demands, job decision latitude, and mental strain: Implications for job redesign. *Admin Sci Quart* 1979;24:285–308.
- 16 Karasek RA. Lower health risk with increased job control among white collar workers. *J Organiz Behav* 1990;11:171–185. doi:10.1002/job.4030110302.
- 17 De Lange AH, Taris TW, Kompier MA, Houtman IL, Bongers PM. "The very best of the millennium": Longitudinal research and the demand-control-(support) model. *J Occup Health Psych* 2003;8:282–305. doi:10.1037/1076-8998.8.4.282.
- 18 Siegrist J. Adverse health effects of high-effort/low-reward conditions. *J Occup Health Psych* 1996;1:27–41. doi:10.1037/1076-8998.1.1.27.
- 19 Vegchel Nv, Jonge Jd, Bosma H, Schaufeli WB. Reviewing the effort-reward imbalance model: drawing up the balance of 45 empirical studies. *Soc Sci* 2005;60:1117–1131. doi:10.1016/j.socscimed.2004.06.043.
- 20 Schaufeli WB, Taris TW. A Critical Review of the Job Demands-Resources Model: Implications for Improving Work and Health. In: Bauer GF, Hämmig O, eds. *Bridging Occupational, Organizational and Public Health: A Transdisciplinary Approach*. Dordrecht: Springer Netherlands 2014:43–68.
- 21 Demerouti E, Bakker AB, Nachreiner F, Schaufeli WB. The job demands-resources model of burnout. *J Appl Psychol* 2001;86:499–512. doi:10.1037/0021-9010.86.3.499.
- 22 Bakker AB, Demerouti E, De Boer E, Schaufeli WB. Job demands and job resources as predictors of absence duration and frequency. *J Vocat Behav* 2003;62:341–356. doi:10.1016/S0001-8791(02)00030-1.
- 23 Bakker AB, Demerouti E. The job demands-resources model: State of the art. *J Manage Psychol* 2007;22:309–328. doi:10.1108/02683940710733115.
- 24 Bakker AB, Demerouti E, Euwema MC. Job resources buffer the impact of job demands on burnout. *J Occup Health Psych* 2005;10:170–180. doi:10.1037/1076-8998.10.2.170.

- 1  
2  
3 25 Hobfoll SE, Johnson RJ, Ennis N, Jackson AP. Resource loss, resource gain, and emotional  
4 outcomes among inner city women. *J Pers Soc Psychol* 2003;84:632–643. doi:10.1037/0022-  
5 3514.84.3.632.  
6  
7  
8  
9 26 Lazarus RS, Folkman S. *Stress, Appraisal, and Coping*. New York: Springer 1984.  
10  
11 27 Bandura A. Self-efficacy: toward a unifying theory of behavioral change. *Psychol Rev*  
12 1977;84:191–215. doi:10.1037/0033-295X.84.2.191.  
13  
14 28 Xanthopoulou D, Bakker AB, Demerouti E, Schaufeli WB. The role of personal resources in  
15 the job demands-resources model. *Int J Stress Manag* 2007;14:121–141. doi:10.1037/1072-  
16 5245.14.2.121.  
17  
18  
19 29 Xanthopoulou D, Bakker AB, Demerouti E, Schaufeli WB. Reciprocal relationships between  
20 job resources, personal resources, and work engagement. *J Vocat Behav* 2009;74:235–244.  
21 doi:10.1016/j.jvb.2008.11.003.  
22  
23  
24 30 Airila A, Hakanen JJ, Schaufeli WB, Luukkonen R, Punakallio A, Lusa S. Are job and  
25 personal resources associated with work ability 10 years later? The mediating role of work  
26 engagement. *Work Stress* 2014;28:87–105. doi:10.1080/02678373.2013.872208.  
27  
28  
29 31 Jackson EM, Dishman RK. Cardiorespiratory fitness and laboratory stress: A meta-regression  
30 analysis. *Psychophysiology* 2006;43:57–72. doi:10.1111/j.1469-8986.2006.00373.x.  
31  
32  
33 32 Hamer M, Steptoe A. Association between physical fitness, parasympathetic control, and  
34 proinflammatory responses to mental stress. *Psychosom Med* 2007;69:660–666.  
35 doi:10.1097/PSY.0b013e318148c4c0.  
36  
37  
38 33 Viswesvaran C, Sanchez JI, Fisher J. The Role of Social Support in the Process of Work  
39 Stress: A Meta-Analysis. *J Vocat Behav* 1999;54:314–334. doi:10.1006/jvbe.1998.1661.  
40  
41  
42 34 Engel GL. The need for a new medical model: A challenge for biomedicine. *Science*  
43 1977;196:129–136. doi:10.1126/science.847460.  
44  
45  
46 35 Mayerl H, Stolz E, Waxenegger A, Rásky E, Freidl W. The Role of Personal and Job  
47 Resources in the Relationship between Psychosocial Job Demands, Mental Strain, and Health  
48 Problems. *Front Psychol* 2016;7:1214. doi:10.3389/fpsyg.2016.01214.  
49  
50  
51 36 Bandura A. Self-efficacy mechanism in human agency. *Am Psychol* 1982;37:122–147.  
52 doi:10.1037/0003-066X.37.2.122.  
53  
54  
55  
56  
57  
58  
59  
60

- 1  
2  
3 37 Schwarzer R, Bäßler J, Kwiatek P, Schröder K, Zhang JX. The Assessment of Optimistic  
4 Self-beliefs: Comparison of the German, Spanish, and Chinese Versions of the General Self-  
5 efficacy Scale. *Appl Psychol* 1997;46:69–88. doi:10.1111/j.1464-0597.1997.tb01096.x.  
6  
7  
8 38 Kopelman P. Health risks associated with overweight and obesity. *Obes Rev* 2007;8:13–17.  
9 doi:10.1111/j.1467-789X.2007.00311.x.  
10  
11 39 Mohr G, Müller A, Rigotti T, Aycan Z, Tschan F. The Assessment of Psychological Strain in  
12 Work Contexts. *Eur J Psychol Assess* 2006;22:198–206. doi:10.1027/1015-5759.22.3.198.  
13  
14 40 Fromm E. *The Sane Society*. 2nd ed. London: Routledge & Kegan Paul 1955.  
15  
16 41 Kanungo RN. The concepts of alienation and involvement revisited. *Psychol Bull*  
17 1979;86:119–138. doi:10.1037/0033-2909.86.1.119.  
18  
19 42 Maslach C, Schaufeli WB, Leiter MP. Job burnout. *Annu Rev Psychol* 2001;52:397–422.  
20  
21 43 Mohr G, Rigotti T, Müller A. Irritation - ein Instrument zur Erfassung psychischer  
22 Beanspruchung im Arbeitskontext. Skalen - und Itemparameter aus 15 Studien. *Z Arb Organ*  
23 2005;49:44–48. doi:10.1026/0932-4089.49.1.44.  
24  
25 44 Freidl W. The impact of anomia as a factor in a demand resource model of health. *Soc Sci*  
26 *Med* 1997;44:1357–1365.  
27  
28 45 Maslach C, Jackson SE. The measurement of experienced burnout. *J Organiz Behav*  
29 1981;2:99–113. doi:10.1002/job.4030020205.  
30  
31 46 Schwarzer R, Jerusalem M. Generalized self-efficacy scale. In: Weinman J, Wright S,  
32 Johnston M, eds. *Measures in health psychology: A user's portfolio. Causal and control*  
33 *beliefs*. Windsor, England: NFER-NELSON 1995: 35–37.  
34  
35 47 Schwarzer R, Jerusalem M. Skalen zur Erfassung von Lehrer- und Schülermerkmalen:  
36 Dokumentation der psychometrischen Verfahren im Rahmen der Wissenschaftlichen  
37 Begleitung des Modellversuchs Selbstwirksame Schulen. Berlin: Freie Universität Berlin;  
38 1999.  
39  
40 48 Muthén B. A general structural equation model with dichotomous, ordered categorical, and  
41 continuous latent variable indicators. *Psychometrika* 1984;49:115–132.  
42 doi:10.1007/BF02294210.  
43  
44 49 Jöreskog KG. Structural equation modeling with ordinal variables. *Multivariate analysis and*  
45 *its applications*. Hayward, CA: Institute of Mathematical Statistics 1994: 297–310.  
46 doi:10.1214/lnms/1215463803.  
47  
48  
49  
50  
51  
52  
53  
54  
55  
56  
57  
58  
59  
60

- 1  
2  
3  
4 50 Hu Lt, Bentler PM. Cutoff criteria for fit indexes in covariance structure analysis:  
5 Conventional criteria versus new alternatives. *Struct Equ Modeling* 1999;6:1–55.  
6 doi:10.1080/10705519909540118.  
7
- 8  
9 51 Rubin DB. *Multiple imputation for nonresponse in surveys*. New York: John Wiley & Sons  
10 1987.  
11
- 12 52 R Core Team. *R: A Language and Environment for Statistical Computing*. Vienna, Austria: R  
13 Foundation for Statistical Computing; 2017. <http://www.R-project.org/>.  
14
- 15 53 Rosseel Y. lavaan: An R Package for Structural Equation Modeling. *J Stat Softw*. 2012;48:1–  
16 36. doi:10.18637/jss.v048.i02.  
17
- 18  
19 54 Buuren Sv, Groothuis-Oudshoorn K. mice: Multivariate Imputation by Chained Equations in  
20 R. *J Stat Softw* 2011;45:1–67.  
21
- 22 55 Head J, Kivimäki M, Martikainen P, Vahtera J, Ferrie JE, Marmot MG. Influence of change  
23 in psychosocial work characteristics on sickness absence: the Whitehall II study. *J Epidemiol*  
24 *Community Health* 2006;60:55–61. doi:10.1136/jech.2005.038752.  
25
- 26  
27 56 Kuper H, Marmot M. Job strain, job demands, decision latitude, and risk of coronary heart  
28 disease within the Whitehall II study. *J Epidemiol Community Health* 2003;57:147–153.  
29 doi:10.1136/jech.57.2.147.  
30
- 31  
32 57 Godin I, Kittel F, Coppieters Y, Siegrist J. A prospective study of cumulative job stress in  
33 relation to mental health. *BMC Public Health* 2005;5:67. doi:10.1186/1471-2458-5-67.  
34
- 35  
36 58 Stansfeld SA, Fuhrer R, Shipley MJ, Marmot MG. Work characteristics predict psychiatric  
37 disorder: prospective results from the Whitehall II Study. *Occup Environ Med* 1999;56:302–  
38 307. doi:10.1136/oem.56.5.302.  
39
- 40  
41 59 Lallukka T, Laaksonen M, Martikainen P, Sarlio-Lähteenkorva S, Lahelma E. Psychosocial  
42 working conditions and weight gain among employees. *Int J Obes* 2005;29:909–915.  
43 doi:10.1038/sj.ijo.0802962.  
44
- 45  
46 60 Kivimäki M, Head J, Ferrie J, Shipley M, Brunner E, Vahtera J, et al. Work stress, weight  
47 gain and weight loss: evidence for bidirectional effects of job strain on body mass index in the  
48 Whitehall II study. *Int J Obesity* 2006;30:982–987. doi:10.1038/sj.ijo.0803229.  
49
- 50  
51 61 Brown JD. Staying fit and staying well: Physical fitness as a moderator of life stress. *J Pers*  
52 *Soc Psychol* 1991;60:555–561. doi:10.1037/0022-3514.60.4.555.  
53  
54  
55  
56  
57  
58  
59  
60

- 1  
2  
3 62 Ensel WM, Lin N. Physical fitness and the stress process. doi:10.1002/jcop.10079. *J Commun*  
4 *Psychol* 2004;32:81–101.  
5  
6  
7 63 Crews DJ, Landers DM. A meta-analytic review of aerobic fitness and reactivity to  
8 psychosocial stressors. *Med Sci Sports Exerc* 1987;19:114–120. doi:10.1249/00005768-  
9 198710001-00004.  
10  
11 64 McEwen BS. Protective and damaging effects of stress mediators. *New Engl J Med*  
12 1998;338:171–179. doi:10.1056/NEJM199801153380307.  
13  
14 65 Freidl W, Rásky E, Stronegger WJ. Operationalisation of a demand/resource model of health:  
15 an explorative study. *J Epidemiol Commun H* 1999;53:187–188.  
16  
17 66 Konttinen H, Silventoinen K, Sarlio-Lähteenkorva S, Männistö S, Haukkala A. Emotional  
18 eating and physical activity self-efficacy as pathways in the association between depressive  
19 symptoms and adiposity indicators. *Am J Clin Nutr* 2010;92:1031–1039.  
20 doi:10.3945/ajcn.2010.29732.  
21  
22  
23  
24  
25  
26  
27  
28  
29  
30  
31  
32  
33  
34  
35  
36  
37  
38  
39  
40  
41  
42  
43  
44  
45  
46  
47  
48  
49  
50  
51  
52  
53  
54  
55  
56  
57  
58  
59  
60



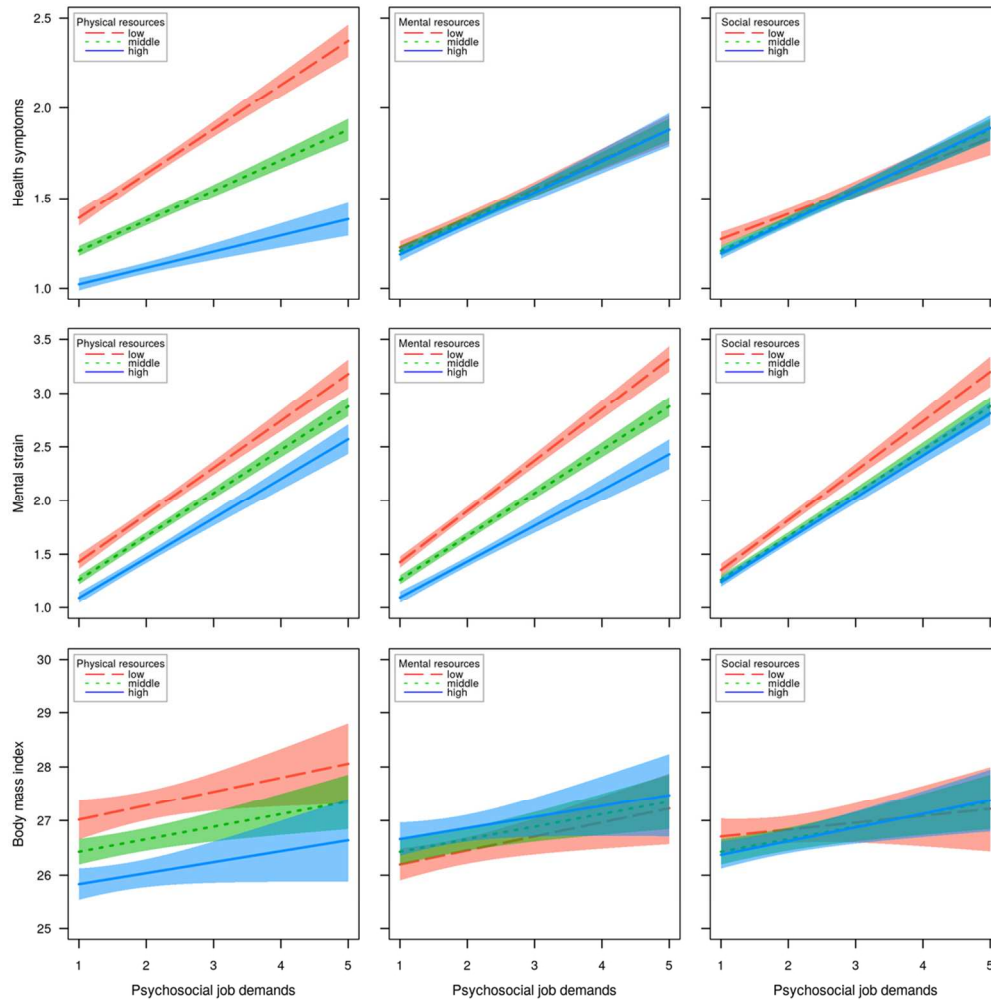

Prediction of the health outcomes as a function of psychosocial job demands and personal resources. The figures show the predicted lines (Model III) with 99% confidence bands for health symptoms, mental strain, and BMI. The coloured lines refer to the classification of the personal resources in low (10th quantile), middle (50th quantile), and high (90th quantile) values. The figures are based on the first imputed complete data set.

99x99mm (300 x 300 DPI)

## Supplementary materials:

### 1 Items used in this research (translated from the German)

#### *Health symptoms*

How often in the last weeks have you suffered from:

|                                                                     | <i>never</i> | <i>rarely</i> | <i>sometimes</i> | <i>often</i> | <i>very often</i> |
|---------------------------------------------------------------------|--------------|---------------|------------------|--------------|-------------------|
| Digestive problems (diarrhoea, constipation, flatulence)            | 1            | 2             | 3                | 4            | 5                 |
| Headache/ migraine                                                  | 1            | 2             | 3                | 4            | 5                 |
| Difficulty initiating or maintaining sleep                          | 1            | 2             | 3                | 4            | 5                 |
| Fatigue/ weakness/ easy tiredness/ weariness                        | 1            | 2             | 3                | 4            | 5                 |
| Nervousness and absent-mindedness                                   | 1            | 2             | 3                | 4            | 5                 |
| Lack of concentration/ weakness of memory                           | 1            | 2             | 3                | 4            | 5                 |
| Back pain/ back problems                                            | 1            | 2             | 3                | 4            | 5                 |
| Leg pain (varicose veins)                                           | 1            | 2             | 3                | 4            | 5                 |
| Hypertension                                                        | 1            | 2             | 3                | 4            | 5                 |
| Palpitations/ tachycardia/ fast heart beats/ pressure on the breast | 1            | 2             | 3                | 4            | 5                 |
| Skin rashes/ itching/ skin redness                                  | 1            | 2             | 3                | 4            | 5                 |
| Respiratory problems/ shortness of breath/ breathlessness/ asthma   | 1            | 2             | 3                | 4            | 5                 |
| Chronic coughing                                                    | 1            | 2             | 3                | 4            | 5                 |

#### *Mental strain*

Please indicate how strongly you agree or disagree with the following statements:

|                             | <i>I do not agree</i> |   |   |   | <i>I strongly agree</i> |
|-----------------------------|-----------------------|---|---|---|-------------------------|
| <b>Emotional irritation</b> |                       |   |   |   |                         |
| I anger quickly.            | 1                     | 2 | 3 | 4 | 5                       |
| I get grumpy when           | 1                     | 2 | 3 | 4 | 5                       |

1  
2  
3  
4  
5  
6  
7  
8  
9  
10  
11  
12  
13  
14  
15  
16  
17  
18  
19  
20  
21  
22  
23  
24  
25  
26  
27  
28  
29  
30  
31  
32  
33  
34  
35  
36  
37  
38  
39  
40  
41  
42  
43  
44  
45  
46  
47  
48  
49  
50  
51  
52  
53  
54  
55  
56  
57  
58  
59  
60

|                                                                    |   |   |   |   |   |
|--------------------------------------------------------------------|---|---|---|---|---|
| others approach me.                                                |   |   |   |   |   |
| I get irritated easily, although I don't want this to happen.      | 1 | 2 | 3 | 4 | 5 |
| <b>Alienation</b>                                                  |   |   |   |   |   |
| I often do not understand what is actually happening.              | 1 | 2 | 3 | 4 | 5 |
| Sometimes I do not know at all what to do in a certain situation.  | 1 | 2 | 3 | 4 | 5 |
| Today things change so fast that I often don't know what to go by. | 1 | 2 | 3 | 4 | 5 |
| <b>Emotional exhaustion</b>                                        |   |   |   |   |   |
| I feel exhausted due to work.                                      | 1 | 2 | 3 | 4 | 5 |
| I look forward to the end of work right from the start.            | 1 | 2 | 3 | 4 | 5 |
| At work I am often tired and rather strained.                      | 1 | 2 | 3 | 4 | 5 |

### **Body mass index**

May I ask you how tall you are – in centimetres?

And how much do you weigh – in kilograms and without clothes? If you don't know exactly, please give an estimate!

### **Psychosocial job demands**

How strongly do you feel burdened in your professional activity by the following?

|                                          | <i>not stressed</i> |   |   |   | <i>strongly stressed</i> |
|------------------------------------------|---------------------|---|---|---|--------------------------|
| Isolation at the workplace               | 1                   | 2 | 3 | 4 | 5                        |
| Time pressure                            | 1                   | 2 | 3 | 4 | 5                        |
| Emotionally burdening and annoying work  | 1                   | 2 | 3 | 4 | 5                        |
| High responsibility for goods and people | 1                   | 2 | 3 | 4 | 5                        |
| Changes in work routines                 | 1                   | 2 | 3 | 4 | 5                        |

|                         |   |   |   |   |   |
|-------------------------|---|---|---|---|---|
| Irregular working hours | 1 | 2 | 3 | 4 | 5 |
|-------------------------|---|---|---|---|---|

### Personal resources

#### Physical

|                                                             |                  |   |   |   |                   |
|-------------------------------------------------------------|------------------|---|---|---|-------------------|
|                                                             | <i>very poor</i> |   |   |   | <i>very good</i>  |
| How would you assess your physical fitness?                 | 1                | 2 | 3 | 4 | 5                 |
|                                                             | <i>never</i>     |   |   |   | <i>very often</i> |
| How often do you feel fit enough to do everything you want? | 1                | 2 | 3 | 4 | 5                 |

#### Mental

How strongly do you agree or disagree with the following statements:

|                                                                           |                       |   |   |   |                         |
|---------------------------------------------------------------------------|-----------------------|---|---|---|-------------------------|
|                                                                           | <i>I do not agree</i> |   |   |   | <i>I strongly agree</i> |
| I can always manage to solve difficult problems if I try hard enough.     | 1                     | 2 | 3 | 4 | 5                       |
| I am confident that I could deal efficiently with unexpected events.      | 1                     | 2 | 3 | 4 | 5                       |
| Thanks to my resourcefulness, I know how to handle unforeseen situations. | 1                     | 2 | 3 | 4 | 5                       |

#### Social

How strongly do you agree or disagree with the following statements: I have persons beyond my immediate family circle ...

|                                                   |                       |   |   |   |                         |
|---------------------------------------------------|-----------------------|---|---|---|-------------------------|
|                                                   | <i>I do not agree</i> |   |   |   | <i>I strongly agree</i> |
| ... on whom I can count in case of emergency.     | 1                     | 2 | 3 | 4 | 5                       |
| ... with whom to talk about very personal things. | 1                     | 2 | 3 | 4 | 5                       |
| ... with whom I can spend my spare time.          | 1                     | 2 | 3 | 4 | 5                       |

1  
2  
3  
4  
5  
6  
7  
8  
9  
10  
11  
12  
13  
14  
15  
16  
17  
18  
19  
20  
21  
22  
23  
24  
25  
26  
27  
28  
29  
30  
31  
32  
33  
34  
35  
36  
37  
38  
39  
40  
41  
42  
43  
44  
45  
46  
47  
48  
49  
50  
51  
52  
53  
54  
55  
56  
57  
58  
59  
60

**Job resources**

How satisfied are you with ...

|                                                     | <i>not at all satisfied</i> |   |   |   | <i>very satisfied</i> |
|-----------------------------------------------------|-----------------------------|---|---|---|-----------------------|
| <b>Job control</b>                                  |                             |   |   |   |                       |
| ... the possibilities to decide on work processes?  | 1                           | 2 | 3 | 4 | 5                     |
| ... the opportunities for co-determination at work? | 1                           | 2 | 3 | 4 | 5                     |
| ... your rights as employee?                        | 1                           | 2 | 3 | 4 | 5                     |
| <b>Job rewards</b>                                  |                             |   |   |   |                       |
| ... your income?                                    | 1                           | 2 | 3 | 4 | 5                     |
| ... the occupational training opportunities?        | 1                           | 2 | 3 | 4 | 5                     |
| ... the career and development opportunities?       | 1                           | 2 | 3 | 4 | 5                     |

**Health behaviour**

|                                                                   | <i>no</i>         |   |   | <i>yes</i>                       |   |                         |
|-------------------------------------------------------------------|-------------------|---|---|----------------------------------|---|-------------------------|
| Do you perform regular exercise in your leisure time?             | 1                 |   |   | 0                                |   |                         |
| Do you eat healthy food?                                          | 1                 |   |   | 0                                |   |                         |
|                                                                   | <i>not at all</i> |   |   | <i>occasionally or regularly</i> |   |                         |
| Do you smoke?                                                     | 0                 |   |   | 1                                |   |                         |
|                                                                   | <i>Not at all</i> |   |   |                                  |   | <i>Nearly every day</i> |
| How often do you consume beer, wine or other alcoholic beverages? | 1                 | 2 | 3 | 4                                | 5 | 6                       |

## 2 Descriptive statistics and correlations

| Variable                              | <i>M (SD) / frequency</i> | Missing values (%) | 1     | 2     | 3     | 4     | 5     | 6    | 7     | 8    | 9     | 10   | 11 |
|---------------------------------------|---------------------------|--------------------|-------|-------|-------|-------|-------|------|-------|------|-------|------|----|
| <b>1 Health symptoms</b>              | 1.44 (0.49)               | 0.08               | -     |       |       |       |       |      |       |      |       |      |    |
| <b>2 Mental strain</b>                | 1.81 (0.79)               | 3.26               | 0.48  | -     |       |       |       |      |       |      |       |      |    |
| <b>3 Body mass index</b>              | 24.82 (3.5)               | 1.95               | 0.14  | 0.07  | -     |       |       |      |       |      |       |      |    |
| <b>4 Job demands</b>                  | 1.86 (0.74)               | 0.79               | 0.41  | 0.55  | 0.08  | -     |       |      |       |      |       |      |    |
| <b>5 Personal resources: physical</b> | 4.10 (0.66)               | 0.19               | -0.52 | -0.42 | -0.18 | -0.35 | -     |      |       |      |       |      |    |
| <b>6 Personal resources: mental</b>   | 3.85 (0.79)               | 2.68               | -0.23 | -0.41 | 0.02  | -0.19 | 0.33  | -    |       |      |       |      |    |
| <b>7 Personal resources: social</b>   | 4.34 (0.84)               | 1.31               | -0.19 | -0.29 | -0.09 | -0.17 | 0.24  | 0.31 | -     |      |       |      |    |
| <b>8 Job resources: control</b>       | 3.77 (0.77)               | 3.17               | -0.31 | -0.36 | -0.01 | -0.34 | 0.37  | 0.40 | 0.26  | -    |       |      |    |
| <b>9 Job resources: rewards</b>       | 3.60 (0.86)               | 7.23               | -0.31 | -0.32 | -0.02 | -0.29 | 0.36  | 0.38 | 0.24  | 0.69 | -     |      |    |
| <b>10 Drinking</b>                    | 3.49 (1.51)               | 0.42               | -0.02 | 0.02  | 0.06  | 0.07  | -0.02 | 0.03 | 0.02  | 0.01 | -0.01 | -    |    |
| <b>11 Age</b>                         | 39.74 (11.28)             | -                  | 0.22  | 0.05  | 0.27  | 0.06  | -0.28 | 0.02 | -0.09 | 0.01 | 0     | 0.05 | -  |
| <b>12 Exercise</b>                    |                           | 0.15               |       |       |       |       |       |      |       |      |       |      |    |

|                     |      |      |                |                |                 |  |  |  |  |  |  |  |  |
|---------------------|------|------|----------------|----------------|-----------------|--|--|--|--|--|--|--|--|
| yes                 | 3255 |      | 1.41<br>(0.46) | 1.74<br>(0.75) | 24.10<br>(3.33) |  |  |  |  |  |  |  |  |
| no                  | 6165 |      | 1.45<br>(0.50) | 1.85<br>(0.80) | 25.20<br>(3.65) |  |  |  |  |  |  |  |  |
| <b>13 Diet</b>      |      | 0.15 |                |                |                 |  |  |  |  |  |  |  |  |
| healthy             | 4436 |      | 1.45<br>(0.47) | 1.80<br>(0.76) | 24.05<br>(3.36) |  |  |  |  |  |  |  |  |
| unhealthy           | 4984 |      | 1.44<br>(0.50) | 1.81<br>(0.81) | 25.50<br>(3.64) |  |  |  |  |  |  |  |  |
| <b>14 Smoking</b>   |      | 0.43 |                |                |                 |  |  |  |  |  |  |  |  |
| no                  | 5385 |      | 1.43<br>(0.49) | 1.72<br>(0.74) | 24.72<br>(3.65) |  |  |  |  |  |  |  |  |
| yes                 | 4008 |      | 1.45<br>(0.49) | 1.93<br>(0.84) | 24.94<br>(3.50) |  |  |  |  |  |  |  |  |
| <b>15 Gender</b>    |      | -    |                |                |                 |  |  |  |  |  |  |  |  |
| male                | 4772 |      | 1.39<br>(0.47) | 1.80<br>(0.79) | 25.77<br>(3.19) |  |  |  |  |  |  |  |  |
| female              | 4662 |      | 1.49<br>(0.50) | 1.82<br>(0.79) | 23.81<br>(3.69) |  |  |  |  |  |  |  |  |
| <b>16 Education</b> |      | -    |                |                |                 |  |  |  |  |  |  |  |  |
| compulsory          | 864  |      | 1.53<br>(0.56) | 2.12<br>(0.83) | 25.50<br>(3.99) |  |  |  |  |  |  |  |  |
| skilled/vocational  | 6116 |      | 1.42<br>(0.48) | 1.75<br>(0.75) | 24.99<br>(3.48) |  |  |  |  |  |  |  |  |
| high school         | 1251 |      | 1.43<br>(0.48) | 1.68<br>(0.70) | 24.39<br>(3.78) |  |  |  |  |  |  |  |  |

|                          |      |   |                |                |                 |  |  |  |  |  |  |  |  |
|--------------------------|------|---|----------------|----------------|-----------------|--|--|--|--|--|--|--|--|
| academic                 | 1203 |   | 1.50<br>(0.48) | 2.04<br>(0.91) | 23.89<br>(3.36) |  |  |  |  |  |  |  |  |
| <b>17 Marital status</b> |      | - |                |                |                 |  |  |  |  |  |  |  |  |
| single                   | 2468 |   | 1.37<br>(0.46) | 1.84<br>(0.84) | 24.26<br>(3.64) |  |  |  |  |  |  |  |  |
| partnership              | 5584 |   | 1.46<br>(0.49) | 1.81<br>(0.76) | 24.98<br>(3.51) |  |  |  |  |  |  |  |  |
| divorced/widowed         | 1382 |   | 1.50<br>(0.53) | 1.75<br>(0.79) | 25.16<br>(3.65) |  |  |  |  |  |  |  |  |

Table notes. For the variables 1-11, we report the mean values (*M*), the standard deviations (*SD*), the proportions of missing values, and the correlation matrix. For the categorical variables, we report the frequencies, the proportions of missing values, and the mean values of the outcome variables for each group level (standard deviations in parentheses).



STROBE 2007 (v4) Statement—Checklist of items that should be included in reports of cross-sectional studies

| Section/Topic             | Item # | Recommendation                                                                                                                                                                       | Reported on page #                                 |
|---------------------------|--------|--------------------------------------------------------------------------------------------------------------------------------------------------------------------------------------|----------------------------------------------------|
| Title and abstract        | 1      | (a) Indicate the study’s design with a commonly used term in the title or the abstract                                                                                               | Yes (see title)                                    |
|                           |        | (b) Provide in the abstract an informative and balanced summary of what was done and what was found                                                                                  | Yes (see abstract)                                 |
| <b>Introduction</b>       |        |                                                                                                                                                                                      |                                                    |
| Background/rationale      | 2      | Explain the scientific background and rationale for the investigation being reported                                                                                                 | p.2-4                                              |
| Objectives                | 3      | State specific objectives, including any prespecified hypotheses                                                                                                                     | p.4                                                |
| <b>Methods</b>            |        |                                                                                                                                                                                      |                                                    |
| Study design              | 4      | Present key elements of study design early in the paper                                                                                                                              | p.1 (see “Strength and limitations of this study”) |
| Setting                   | 5      | Describe the setting, locations, and relevant dates, including periods of recruitment, exposure, follow-up, and data collection                                                      | p.5                                                |
| Participants              | 6      | (a) Give the eligibility criteria, and the sources and methods of selection of participants                                                                                          | p.5                                                |
| Variables                 | 7      | Clearly define all outcomes, exposures, predictors, potential confounders, and effect modifiers. Give diagnostic criteria, if applicable                                             | p.5-8                                              |
| Data sources/ measurement | 8*     | For each variable of interest, give sources of data and details of methods of assessment (measurement). Describe comparability of assessment methods if there is more than one group | p.5-7                                              |
| Bias                      | 9      | Describe any efforts to address potential sources of bias                                                                                                                            | p.6                                                |
| Study size                | 10     | Explain how the study size was arrived at                                                                                                                                            | p.5                                                |
| Quantitative variables    | 11     | Explain how quantitative variables were handled in the analyses. If applicable, describe which groupings were chosen and why                                                         | p.5-7                                              |
| Statistical methods       | 12     | (a) Describe all statistical methods, including those used to control for confounding                                                                                                | p.7                                                |
|                           |        | (b) Describe any methods used to examine subgroups and interactions                                                                                                                  | p.7                                                |
|                           |        | (c) Explain how missing data were addressed                                                                                                                                          | p.7-8                                              |
|                           |        | (d) If applicable, describe analytical methods taking account of sampling strategy                                                                                                   | Not applicable                                     |

|                          |     |                                                                                                                                                                                                              |                                 |
|--------------------------|-----|--------------------------------------------------------------------------------------------------------------------------------------------------------------------------------------------------------------|---------------------------------|
|                          |     | (e) Describe any sensitivity analyses                                                                                                                                                                        | Not applicable                  |
| <b>Results</b>           |     |                                                                                                                                                                                                              |                                 |
| Participants             | 13* | (a) Report numbers of individuals at each stage of study—eg numbers potentially eligible, examined for eligibility, confirmed eligible, included in the study, completing follow-up, and analysed            | p.5                             |
|                          |     | (b) Give reasons for non-participation at each stage                                                                                                                                                         | p.5                             |
|                          |     | (c) Consider use of a flow diagram                                                                                                                                                                           | Not applicable                  |
| Descriptive data         | 14* | (a) Give characteristics of study participants (eg demographic, clinical, social) and information on exposures and potential confounders                                                                     | p.5 and Supplementary materials |
|                          |     | (b) Indicate number of participants with missing data for each variable of interest                                                                                                                          | See supplementary materials     |
| Outcome data             | 15* | Report numbers of outcome events or summary measures                                                                                                                                                         | See supplementary materials     |
| Main results             | 16  | (a) Give unadjusted estimates and, if applicable, confounder-adjusted estimates and their precision (eg, 95% confidence interval). Make clear which confounders were adjusted for and why they were included | See supplementary materials     |
|                          |     | (b) Report category boundaries when continuous variables were categorized                                                                                                                                    | See table notes of Figure 1     |
|                          |     | (c) If relevant, consider translating estimates of relative risk into absolute risk for a meaningful time period                                                                                             | Not applicable                  |
| Other analyses           | 17  | Report other analyses done—eg analyses of subgroups and interactions, and sensitivity analyses                                                                                                               | p.8-12                          |
| <b>Discussion</b>        |     |                                                                                                                                                                                                              |                                 |
| Key results              | 18  | Summarise key results with reference to study objectives                                                                                                                                                     | p.13-14                         |
| Limitations              | 19  | Discuss limitations of the study, taking into account sources of potential bias or imprecision. Discuss both direction and magnitude of any potential bias                                                   | p.14                            |
| Interpretation           | 20  | Give a cautious overall interpretation of results considering objectives, limitations, multiplicity of analyses, results from similar studies, and other relevant evidence                                   | p.13-14                         |
| Generalisability         | 21  | Discuss the generalisability (external validity) of the study results                                                                                                                                        | p.13-14                         |
| <b>Other information</b> |     |                                                                                                                                                                                                              |                                 |
| Funding                  | 22  | Give the source of funding and the role of the funders for the present study and, if applicable, for the original study on which the present article is based                                                | Not applicable                  |

1  
2 \*Give information separately for cases and controls in case-control studies and, if applicable, for exposed and unexposed groups in cohort and cross-sectional studies.  
3  
4

5 **Note:** An Explanation and Elaboration article discusses each checklist item and gives methodological background and published examples of transparent reporting. The STROBE  
6 checklist is best used in conjunction with this article (freely available on the Web sites of PLoS Medicine at <http://www.plosmedicine.org/>, Annals of Internal Medicine at  
7 <http://www.annals.org/>, and Epidemiology at <http://www.epidem.com/>). Information on the STROBE Initiative is available at [www.strobe-statement.org](http://www.strobe-statement.org).  
8  
9

10  
11  
12  
13  
14  
15  
16  
17  
18  
19  
20  
21  
22  
23  
24  
25  
26  
27  
28  
29  
30  
31  
32  
33  
34  
35  
36  
37  
38  
39  
40  
41  
42  
43  
44  
45  
46  
47

For peer review only
